# Supplementary material for: Pancreatic progenitor epigenome maps prioritize type 2 diabetes risk genes with roles in development
Source: eLife. 2021 Feb 5;10:e59067. doi: 10.7554/eLife.59067 (PMC7864636; doi:10.7554/eLife.59067)
Supplement: Figure 2—source data 1. [file elife-59067-fig2-data1.xlsx]

## Sheet: Sheet1
Figure 2 – source data 1: Chromosomal coordinates of pancreatic progenitor-specific stretch enhancers (PSSE).
chr	start	end
chr1	3030400	3033600
chr1	3528800	3532000
chr1	11398400	11400600
chr1	12439400	12442600
chr1	17604200	17606200
chr1	19946200	19948400
chr1	22298200	22301600
chr1	23892000	23894200
chr1	24699800	24702800
chr1	26040000	26042000
chr1	36951200	36954000
chr1	44451600	44453800
chr1	44761600	44763800
chr1	45007800	45009800
chr1	48341200	48343200
chr1	48377400	48380200
chr1	48562000	48565400
chr1	48579800	48582800
chr1	56879200	56881800
chr1	64105800	64108200
chr1	64237000	64239200
chr1	95585600	95588400
chr1	110274000	110276400
chr1	113797200	113799200
chr1	117722800	117725400
chr1	120332800	120334800
chr1	151670000	151673000
chr1	154756800	154758800
chr1	157084200	157086400
chr1	157208400	157211600
chr1	157270800	157272800
chr1	161186400	161190000
chr1	171128000	171130800
chr1	176487800	176490000
chr1	176743800	176745800
chr1	180216000	180218200
chr1	192479600	192483200
chr1	206942400	206944400
chr1	208399000	208401200
chr1	208683600	208685600
chr1	208706000	208708200
chr1	210723400	210727200
chr1	213822600	213825400
chr1	214200000	214202400
chr1	214223000	214225400
chr1	229387800	229390000
chr1	230920600	230923400
chr1	236055200	236057400
chr1	242832600	242834600
chr10	2121200	2124000
chr10	13806800	13808800
chr10	14444600	14446600
chr10	17428600	17431600
chr10	24172600	24175600
chr10	24206200	24208400
chr10	24829400	24832000
chr10	28796400	28798400
chr10	29094800	29098200
chr10	29393000	29395600
chr10	29823200	29825400
chr10	29947400	29951000
chr10	30356600	30359800
chr10	31995800	31998600
chr10	35025800	35027800
chr10	36737200	36739600
chr10	61730600	61732600
chr10	72886800	72889000
chr10	73855800	73859400
chr10	74183800	74187000
chr10	74208400	74210800
chr10	77271600	77273600
chr10	78010600	78013000
chr10	80052200	80054200
chr10	82227400	82229600
chr10	85465800	85468200
chr10	91110800	91113200
chr10	91307200	91309800
chr10	95218000	95220000
chr10	95750600	95753000
chr10	112135600	112138000
chr10	112311400	112314800
chr10	112548000	112550200
chr10	114487600	114490000
chr10	114497800	114503600
chr10	114570400	114572400
chr10	115032200	115034600
chr10	115238600	115242800
chr10	116788600	116790800
chr10	121168600	121170600
chr10	122739600	122744200
chr10	123051000	123053400
chr10	123062200	123065000
chr10	123072200	123074200
chr10	123995200	123997400
chr10	125271800	125274200
chr10	127768400	127770800
chr11	1680800	1683400
chr11	1695600	1700000
chr11	1702000	1704800
chr11	1710800	1713200
chr11	12493800	12495800
chr11	27480800	27483800
chr11	34276600	34279000
chr11	34305200	34307400
chr11	45412000	45414200
chr11	55723600	55725600
chr11	57362600	57364600
chr11	57738400	57741200
chr11	65909400	65911400
chr11	68358200	68360600
chr11	70884800	70887200
chr11	71828000	71830800
chr11	86180200	86182200
chr11	95782600	95785400
chr11	95831000	95833400
chr11	106078400	106080800
chr11	112666200	112669000
chr11	113947000	113950200
chr11	113961000	113963600
chr11	113968600	113971800
chr11	114079000	114084000
chr11	114103200	114105600
chr11	115588000	115590200
chr11	116283200	116285200
chr11	116699200	116701400
chr11	118186000	118188000
chr11	125038000	125040600
chr11	125131000	125134000
chr11	125211400	125214400
chr11	126147000	126149000
chr11	134915800	134917800
chr12	1848400	1852800
chr12	16683400	16685400
chr12	20123800	20127000
chr12	27424200	27426400
chr12	31925200	31929000
chr12	43183000	43185400
chr12	55892200	55894800
chr12	66270400	66272600
chr12	66319200	66321400
chr12	92936800	92938800
chr12	93408200	93411400
chr12	95491800	95495000
chr12	101024800	101027000
chr12	105418000	105420000
chr12	106415000	106417000
chr12	106734800	106737000
chr12	113878000	113880800
chr12	119048200	119050200
chr12	119317400	119319400
chr12	119740000	119742000
chr12	122146400	122149000
chr12	124762400	124764400
chr13	43842800	43845200
chr13	44817000	44819400
chr13	50818000	50820200
chr13	71604200	71606200
chr13	80196000	80198600
chr13	97776600	97778800
chr13	99057400	99059400
chr13	99158400	99160400
chr13	104168000	104170400
chr14	21522400	21524400
chr14	54819400	54821800
chr14	59238200	59240800
chr14	59430400	59432400
chr14	61569200	61571200
chr14	62068400	62070400
chr14	64556600	64560000
chr14	68757600	68759800
chr14	68830200	68832200
chr14	68984200	68986600
chr14	69104000	69106200
chr14	71850200	71852200
chr14	75688800	75691400
chr14	85948200	85950400
chr14	87873400	87876000
chr14	88461200	88463600
chr14	91879400	91881400
chr14	94244200	94246200
chr14	95038200	95040200
chr14	96940000	96942000
chr15	25885800	25888000
chr15	31448800	31452600
chr15	50023400	50025400
chr15	54135400	54137400
chr15	67650600	67652800
chr15	77909000	77911800
chr15	79864200	79866200
chr15	89707800	89710200
chr15	91741600	91744200
chr15	92663600	92665600
chr15	92707000	92709800
chr16	1630000	1632400
chr16	3788000	3790000
chr16	5084600	5088400
chr16	5788400	5790400
chr16	10425200	10427800
chr16	11372600	11375200
chr16	15592600	15594600
chr16	17398000	17400000
chr16	20337200	20340000
chr16	30464000	30466000
chr16	49673200	49675200
chr16	52611000	52613800
chr16	56942600	56945000
chr16	71237600	71240400
chr16	72935000	72937000
chr16	73028800	73031600
chr16	76256000	76258200
chr16	82362400	82364400
chr16	85047000	85049400
chr17	1639000	1641200
chr17	17571200	17574600
chr17	32857400	32859800
chr17	34269000	34271200
chr17	34299200	34301600
chr17	39831200	39833200
chr17	41650200	41652200
chr17	42620200	42622400
chr17	47177800	47179800
chr17	60166200	60169800
chr17	62253800	62256600
chr17	69676400	69678600
chr17	70071000	70074200
chr17	74167800	74170800
chr17	76743200	76745200
chr17	77636200	77639600
chr17	77713000	77715400
chr17	78815800	78817800
chr18	7060800	7063000
chr18	7063600	7066200
chr18	19558000	19561800
chr18	43917200	43919200
chr18	48262200	48265600
chr18	50024600	50026800
chr18	54808000	54810400
chr18	55463600	55466600
chr18	59401200	59405000
chr18	59491600	59493600
chr18	61868200	61870600
chr18	71560600	71564200
chr18	71891400	71893600
chr19	1673600	1676600
chr19	9169400	9172000
chr19	17522400	17524600
chr19	28779000	28781200
chr19	28914600	28917400
chr19	29635000	29637200
chr19	53685400	53687800
chr2	6342000	6345400
chr2	9846400	9848400
chr2	10367600	10369600
chr2	14915600	14917600
chr2	15071200	15074200
chr2	19703200	19706200
chr2	26561800	26564200
chr2	42104800	42108200
chr2	47452200	47454200
chr2	47536000	47538800
chr2	67279800	67282400
chr2	70011400	70013600
chr2	73247400	73249400
chr2	79404800	79406800
chr2	106328200	106330200
chr2	108930600	108934000
chr2	110434000	110437600
chr2	118312800	118314800
chr2	119954000	119956800
chr2	122626400	122628400
chr2	125026200	125028200
chr2	129351200	129353200
chr2	135168400	135171000
chr2	135188600	135191800
chr2	138732000	138734200
chr2	138879200	138881200
chr2	149916200	149918200
chr2	149925200	149930800
chr2	150023200	150027000
chr2	178466800	178469200
chr2	183688200	183690600
chr2	198815800	198818200
chr2	201138800	201140800
chr2	201346600	201349000
chr2	208655400	208657600
chr2	209502600	209505000
chr2	216138600	216140800
chr2	216282200	216284200
chr2	216679800	216683200
chr2	216696000	216699800
chr2	218196000	218198200
chr2	219175200	219177600
chr2	228623200	228626800
chr2	232211800	232214000
chr2	240452800	240455000
chr20	6038200	6040600
chr20	10774000	10777400
chr20	11227800	11231000
chr20	11529000	11531600
chr20	15984600	15986600
chr20	22396400	22399600
chr20	22537400	22540000
chr20	33626600	33628800
chr20	41585000	41587600
chr20	50632200	50635000
chr21	35021000	35023800
chr21	38231800	38234400
chr21	42347200	42349800
chr22	26349000	26351000
chr22	37722200	37724600
chr22	39727400	39729800
chr22	40051400	40053600
chr22	46846400	46850800
chr3	4606200	4608600
chr3	12485400	12487800
chr3	14660800	14665000
chr3	40913800	40916000
chr3	44476000	44478000
chr3	45160000	45162400
chr3	49917800	49920200
chr3	60294600	60296600
chr3	63074400	63076600
chr3	63425800	63428200
chr3	63562000	63564600
chr3	71237600	71240400
chr3	72728200	72730200
chr3	76922600	76925000
chr3	122083800	122085800
chr3	122110600	122113400
chr3	123322600	123325600
chr3	133388400	133390400
chr3	137852800	137857200
chr3	155322400	155324600
chr3	156445200	156448600
chr3	169105800	169108600
chr3	182456400	182458800
chr3	182477200	182481000
chr3	186664200	186666600
chr3	190312000	190314600
chr4	2908800	2912000
chr4	26173200	26175200
chr4	38110400	38113000
chr4	38424400	38427000
chr4	41146800	41149200
chr4	47734200	47737000
chr4	48073000	48075000
chr4	53779000	53781600
chr4	53921000	53923200
chr4	56921200	56923600
chr4	69597400	69599400
chr4	69736200	69738400
chr4	69739000	69741000
chr4	72473000	72476000
chr4	79072400	79074400
chr4	79076000	79078200
chr4	79488000	79490000
chr4	82300200	82302200
chr4	96029400	96032000
chr4	104226800	104229000
chr4	181883800	181885800
chr5	5312000	5315000
chr5	5361400	5364200
chr5	11523600	11526000
chr5	31212600	31214600
chr5	35815200	35817800
chr5	62980800	62983000
chr5	65638200	65641000
chr5	68625400	68627400
chr5	78389000	78391400
chr5	79540800	79542800
chr5	79545800	79547800
chr5	89647800	89650000
chr5	115868200	115870400
chr5	123908800	123911200
chr5	126282200	126284200
chr5	126763600	126766000
chr5	133972800	133975400
chr5	134665000	134667200
chr5	139644800	139647400
chr5	143866400	143869000
chr5	156119200	156121400
chr5	160349800	160352200
chr5	160522400	160524400
chr5	168849000	168851000
chr5	176124400	176126400
chr6	3402200	3404400
chr6	3664200	3666200
chr6	14310200	14312400
chr6	14315800	14319200
chr6	14504600	14507600
chr6	15089000	15091000
chr6	16849000	16852000
chr6	20876400	20880200
chr6	25301800	25303800
chr6	37257600	37259800
chr6	38975200	38978000
chr6	87808800	87810800
chr6	96748000	96750000
chr6	104973400	104976200
chr6	107245800	107249000
chr6	107985600	107989400
chr6	117672200	117674400
chr6	134774600	134776800
chr6	143862400	143865200
chr6	144973200	144976400
chr6	145214000	145216000
chr6	148388800	148391000
chr6	155405200	155407400
chr6	160721800	160723800
chr6	168161800	168164000
chr6	169086400	169089200
chr7	164600	167200
chr7	2451200	2453200
chr7	3183200	3185800
chr7	3202800	3204800
chr7	3245800	3249000
chr7	3256400	3259000
chr7	26034200	26037000
chr7	26045400	26048600
chr7	29409200	29411400
chr7	36805200	36810600
chr7	37221800	37224200
chr7	37480400	37482800
chr7	43526000	43530000
chr7	45075000	45077000
chr7	55254600	55257600
chr7	69459600	69461600
chr7	77024000	77026000
chr7	100428400	100431000
chr7	105126200	105128600
chr7	110406200	110409000
chr7	116448600	116450600
chr7	134675600	134678400
chr7	140116200	140118800
chr8	6709000	6712400
chr8	11798000	11801200
chr8	19367200	19369800
chr8	27179800	27181800
chr8	27607400	27609400
chr8	37159000	37161600
chr8	37231600	37234200
chr8	37402800	37405600
chr8	54528000	54530400
chr8	61860400	61863200
chr8	80731800	80734600
chr8	80738600	80741400
chr8	80775800	80779600
chr8	80874400	80877200
chr8	84044000	84047000
chr8	88066600	88068800
chr8	98842600	98844600
chr8	101684600	101687200
chr8	101835800	101837800
chr8	113470400	113472400
chr8	129511200	129513400
chr8	143588200	143590200
chr8	145916200	145918200
chr9	4147200	4149600
chr9	16099200	16102200
chr9	21497800	21501200
chr9	34688000	34690200
chr9	36866800	36869000
chr9	38354200	38356200
chr9	80757600	80760200
chr9	83111400	83113400
chr9	96002400	96004800
chr9	100989200	100991200
chr9	101937800	101940200
chr9	108180200	108182600
chr9	110010000	110012400
chr9	116396200	116399200
chr9	120161800	120164000
chr9	124394200	124396400
chr9	126120000	126123200
chr9	128223000	128226400
chr9	129096400	129098400
chr9	129404000	129408400
chr9	139051600	139054000
chr9	140096000	140098200
chrX	38201200	38204400
chrX	39309000	39311000
chrX	39500200	39502200
chrX	40238800	40240800
chrX	46827800	46830200
chrX	69744600	69746800
chrX	71209400	71211400
chrX	128278000	128281000
chrX	132809000	132811000
chrX	133849000	133851200
chrX	152910200	152912200
chrY	2704200	2706600
chrY	2752800	2756200
