# Supplementary material for: Pancreatic progenitor epigenome maps prioritize type 2 diabetes risk genes with roles in development
Source: eLife. 2021 Feb 5;10:e59067. doi: 10.7554/eLife.59067 (PMC7864636; doi:10.7554/eLife.59067)
Supplement: Figure 2—source data 2. [file elife-59067-fig2-data2.xlsx]

## Sheet: Sheet1
Figure 2 – source data 2: Enriched gene ontology terms for PSSE-associated genes.
GroupID	Category	Term	Description	LogP	Log(q-value)	InTerm_InList	Genes	Symbols
1_Summary	GO Biological Processes	GO:0001944	vasculature development	-7.76794	-3.63911	34/793	182,306,575,1717,2185,2263,2335,2719,3091,3516,4638,5345,5629,6092,6347,7855,8038,8091,8325,9394,23251,23328,25976,55636,55742,57608,79602,83605,83943,130497,144165,153090,219699,284217,27086,1081,1956,4072,8895,9126,23224,55604,114609,7145,55612,55920,286204	JAG1,ANXA3,ADGRB1,DHCR7,PTK2B,FGFR2,FN1,GPC3,HIF1A,RBPJ,MYLK,SERPINF2,PROX1,ROBO2,CCL2,FZD5,ADAM12,HMGA2,FZD8,HS6ST1,MINAR1,SASH1,TIPARP,CHD7,PARVA,JCAD,ADIPOR2,CCM2,IMMP2L,OSR1,PRICKLE1,DAB2IP,UNC5B,LAMA1,FOXP1,CGA,EGFR,EPCAM,CPNE3,SMC3,SYNE2,CARMIL1,TIRAP,TNS1,FERMT1,RCC2,CRB2
1_Member	GO Biological Processes	GO:0001944	vasculature development	-7.76794	-3.63911	34/793	182,306,575,1717,2185,2263,2335,2719,3091,3516,4638,5345,5629,6092,6347,7855,8038,8091,8325,9394,23251,23328,25976,55636,55742,57608,79602,83605,83943,130497,144165,153090,219699,284217	JAG1,ANXA3,ADGRB1,DHCR7,PTK2B,FGFR2,FN1,GPC3,HIF1A,RBPJ,MYLK,SERPINF2,PROX1,ROBO2,CCL2,FZD5,ADAM12,HMGA2,FZD8,HS6ST1,MINAR1,SASH1,TIPARP,CHD7,PARVA,JCAD,ADIPOR2,CCM2,IMMP2L,OSR1,PRICKLE1,DAB2IP,UNC5B,LAMA1
1_Member	GO Biological Processes	GO:0001568	blood vessel development	-7.65562	-3.63911	33/762	182,306,575,1717,2185,2263,2335,2719,3091,3516,4638,5345,5629,6092,6347,7855,8038,8091,8325,9394,23251,23328,25976,55636,55742,57608,79602,83605,130497,144165,153090,219699,284217	JAG1,ANXA3,ADGRB1,DHCR7,PTK2B,FGFR2,FN1,GPC3,HIF1A,RBPJ,MYLK,SERPINF2,PROX1,ROBO2,CCL2,FZD5,ADAM12,HMGA2,FZD8,HS6ST1,MINAR1,SASH1,TIPARP,CHD7,PARVA,JCAD,ADIPOR2,CCM2,OSR1,PRICKLE1,DAB2IP,UNC5B,LAMA1
1_Member	GO Biological Processes	GO:0048514	blood vessel morphogenesis	-6.10591	-2.48734	28/682	182,306,575,2185,2263,2335,3091,3516,4638,5345,5629,6347,7855,8038,8091,8325,9394,23251,23328,25976,55636,55742,57608,79602,83605,153090,219699,284217	JAG1,ANXA3,ADGRB1,PTK2B,FGFR2,FN1,HIF1A,RBPJ,MYLK,SERPINF2,PROX1,CCL2,FZD5,ADAM12,HMGA2,FZD8,HS6ST1,MINAR1,SASH1,TIPARP,CHD7,PARVA,JCAD,ADIPOR2,CCM2,DAB2IP,UNC5B,LAMA1
1_Member	GO Biological Processes	GO:0001525	angiogenesis	-3.85191	-1.26187	21/588	182,306,575,2185,2263,2335,3091,3516,6347,7855,8038,8091,8325,9394,23251,23328,55742,57608,79602,153090,219699	JAG1,ANXA3,ADGRB1,PTK2B,FGFR2,FN1,HIF1A,RBPJ,CCL2,FZD5,ADAM12,HMGA2,FZD8,HS6ST1,MINAR1,SASH1,PARVA,JCAD,ADIPOR2,DAB2IP,UNC5B
1_Member	GO Biological Processes	GO:0010595	positive regulation of endothelial cell migration	-2.56768	-0.588211	7/129	306,2185,3091,5629,23328,27086,57608	ANXA3,PTK2B,HIF1A,PROX1,SASH1,FOXP1,JCAD
1_Member	GO Biological Processes	GO:0040017	positive regulation of locomotion	-2.54987	-0.588211	18/598	306,1081,1956,2185,2335,3091,4072,4638,5629,8895,9126,23224,23328,27086,55604,57608,114609,153090	ANXA3,CGA,EGFR,PTK2B,FN1,HIF1A,EPCAM,MYLK,PROX1,CPNE3,SMC3,SYNE2,SASH1,FOXP1,CARMIL1,JCAD,TIRAP,DAB2IP
1_Member	GO Biological Processes	GO:0001667	ameboidal-type cell migration	-2.49313	-0.557678	15/464	306,575,2185,2335,2719,3091,5629,7145,23328,27086,55612,55920,57608,153090,286204	ANXA3,ADGRB1,PTK2B,FN1,GPC3,HIF1A,PROX1,TNS1,SASH1,FOXP1,FERMT1,RCC2,JCAD,DAB2IP,CRB2
1_Member	GO Biological Processes	GO:2000147	positive regulation of cell motility	-2.41282	-0.510253	17/568	306,1081,1956,2185,2335,3091,4072,4638,5629,8895,23224,23328,27086,55604,57608,114609,153090	ANXA3,CGA,EGFR,PTK2B,FN1,HIF1A,EPCAM,MYLK,PROX1,CPNE3,SYNE2,SASH1,FOXP1,CARMIL1,JCAD,TIRAP,DAB2IP
1_Member	GO Biological Processes	GO:0051272	positive regulation of cellular component movement	-2.28692	-0.455105	17/585	306,1081,1956,2185,2335,3091,4072,4638,5629,8895,23224,23328,27086,55604,57608,114609,153090	ANXA3,CGA,EGFR,PTK2B,FN1,HIF1A,EPCAM,MYLK,PROX1,CPNE3,SYNE2,SASH1,FOXP1,CARMIL1,JCAD,TIRAP,DAB2IP
1_Member	GO Biological Processes	GO:0030335	positive regulation of cell migration	-2.23094	-0.42423	16/544	306,1081,1956,2185,2335,3091,4638,5629,8895,23224,23328,27086,55604,57608,114609,153090	ANXA3,CGA,EGFR,PTK2B,FN1,HIF1A,MYLK,PROX1,CPNE3,SYNE2,SASH1,FOXP1,CARMIL1,JCAD,TIRAP,DAB2IP
1_Member	GO Biological Processes	GO:0010594	regulation of endothelial cell migration	-2.19562	-0.406683	9/230	306,575,2185,3091,5629,23328,27086,57608,153090	ANXA3,ADGRB1,PTK2B,HIF1A,PROX1,SASH1,FOXP1,JCAD,DAB2IP
2_Summary	GO Biological Processes	GO:0048729	tissue morphogenesis	-6.72568	-2.88526	29/674	182,1741,1956,2263,2487,2535,2719,3091,3516,4147,4609,4638,4919,5629,6092,6664,7855,8091,9620,27086,55327,55636,80144,83605,94134,130497,144165,284217,286204,55742,5205,55084,3399,5887,9394,91461,54796,63976,153090,4010,5362,10159,56243,64131,149473,1387,2335,7704,55614,3720,51196,55717,79602,575,1496,2353,6840,7345,7402,8038,10753,57190,494470,6431,56975,64114	JAG1,DLG3,EGFR,FGFR2,FRZB,FZD2,GPC3,HIF1A,RBPJ,MATN2,MYC,MYLK,ROR1,PROX1,ROBO2,SOX11,FZD5,HMGA2,CELSR1,FOXP1,LIN7C,CHD7,FRAS1,CCM2,ARHGAP12,OSR1,PRICKLE1,LAMA1,CRB2,PARVA,ATP8B1,SOBP,ID3,RAD23B,HS6ST1,PKDCC,BNC2,PRDM16,DAB2IP,LMX1B,PLXNA2,ATP6AP2,KIAA1217,XYLT1,CCDC24,CREBBP,FN1,ZBTB16,KIF16B,JARID2,PLCE1,WDR11,ADIPOR2,ADGRB1,CTNNA2,FOS,SVIL,UCHL1,UTRN,ADAM12,CAPN9,SELENON,RNF165,SRSF6,FAM20C,TMB…
2_Member	GO Biological Processes	GO:0048729	tissue morphogenesis	-6.72568	-2.88526	29/674	182,1741,1956,2263,2487,2535,2719,3091,3516,4147,4609,4638,4919,5629,6092,6664,7855,8091,9620,27086,55327,55636,80144,83605,94134,130497,144165,284217,286204	JAG1,DLG3,EGFR,FGFR2,FRZB,FZD2,GPC3,HIF1A,RBPJ,MATN2,MYC,MYLK,ROR1,PROX1,ROBO2,SOX11,FZD5,HMGA2,CELSR1,FOXP1,LIN7C,CHD7,FRAS1,CCM2,ARHGAP12,OSR1,PRICKLE1,LAMA1,CRB2
2_Member	GO Biological Processes	GO:0060411	cardiac septum morphogenesis	-5.8326	-2.36015	9/76	182,2263,2535,3516,5629,6092,6664,55636,55742	JAG1,FGFR2,FZD2,RBPJ,PROX1,ROBO2,SOX11,CHD7,PARVA
2_Member	GO Biological Processes	GO:0002009	morphogenesis of an epithelium	-5.37058	-2.15536	23/540	182,1741,1956,2263,2487,2535,2719,3091,3516,4609,4919,5629,6664,7855,9620,27086,55327,80144,83605,94134,130497,144165,284217	JAG1,DLG3,EGFR,FGFR2,FRZB,FZD2,GPC3,HIF1A,RBPJ,MYC,ROR1,PROX1,SOX11,FZD5,CELSR1,FOXP1,LIN7C,FRAS1,CCM2,ARHGAP12,OSR1,PRICKLE1,LAMA1
2_Member	GO Biological Processes	GO:0003206	cardiac chamber morphogenesis	-4.73821	-1.80974	10/129	182,2263,2535,3091,3516,5629,6092,6664,55636,55742	JAG1,FGFR2,FZD2,HIF1A,RBPJ,PROX1,ROBO2,SOX11,CHD7,PARVA
2_Member	GO Biological Processes	GO:0043583	ear development	-4.71774	-1.80974	13/219	182,2263,2487,2535,3516,4919,5205,5629,9620,55084,55636,83605,130497	JAG1,FGFR2,FRZB,FZD2,RBPJ,ROR1,ATP8B1,PROX1,CELSR1,SOBP,CHD7,CCM2,OSR1
2_Member	GO Biological Processes	GO:0035904	aorta development	-4.7121	-1.80974	7/58	182,3516,4638,5629,6092,55636,144165	JAG1,RBPJ,MYLK,PROX1,ROBO2,CHD7,PRICKLE1
2_Member	GO Biological Processes	GO:0003151	outflow tract morphogenesis	-4.69591	-1.80974	8/80	182,2263,2535,3091,3516,6092,6664,55742	JAG1,FGFR2,FZD2,HIF1A,RBPJ,ROBO2,SOX11,PARVA
2_Member	GO Biological Processes	GO:0048839	inner ear development	-4.61871	-1.74832	12/192	182,2263,2487,2535,3516,4919,5205,5629,9620,55084,55636,83605	JAG1,FGFR2,FRZB,FZD2,RBPJ,ROR1,ATP8B1,PROX1,CELSR1,SOBP,CHD7,CCM2
2_Member	GO Biological Processes	GO:0003279	cardiac septum development	-4.44343	-1.60668	9/112	182,2263,2535,3516,5629,6092,6664,55636,55742	JAG1,FGFR2,FZD2,RBPJ,PROX1,ROBO2,SOX11,CHD7,PARVA
2_Member	GO Biological Processes	GO:0060412	ventricular septum morphogenesis	-4.41907	-1.60668	6/44	2263,2535,3516,5629,6092,6664	FGFR2,FZD2,RBPJ,PROX1,ROBO2,SOX11
2_Member	GO Biological Processes	GO:0048568	embryonic organ development	-4.24089	-1.46989	18/429	1956,2263,2487,2535,3091,3399,3516,5629,5887,6664,7855,9394,9620,55084,55636,91461,130497,286204	EGFR,FGFR2,FRZB,FZD2,HIF1A,ID3,RBPJ,PROX1,RAD23B,SOX11,FZD5,HS6ST1,CELSR1,SOBP,CHD7,PKDCC,OSR1,CRB2
2_Member	GO Biological Processes	GO:0003208	cardiac ventricle morphogenesis	-4.02052	-1.34782	7/74	182,2263,3091,3516,5629,6664,55636	JAG1,FGFR2,HIF1A,RBPJ,PROX1,SOX11,CHD7
2_Member	GO Biological Processes	GO:0003231	cardiac ventricle development	-3.93882	-1.29762	9/130	182,2263,2535,3091,3516,5629,6092,6664,55636	JAG1,FGFR2,FZD2,HIF1A,RBPJ,PROX1,ROBO2,SOX11,CHD7
2_Member	GO Biological Processes	GO:0035909	aorta morphogenesis	-3.86251	-1.26187	5/35	182,3516,4638,5629,55636	JAG1,RBPJ,MYLK,PROX1,CHD7
2_Member	GO Biological Processes	GO:0007423	sensory organ development	-3.81833	-1.24149	20/548	182,1956,2263,2487,2535,3091,3516,4919,5205,5629,6664,7855,9620,54796,55084,55636,63976,83605,130497,284217	JAG1,EGFR,FGFR2,FRZB,FZD2,HIF1A,RBPJ,ROR1,ATP8B1,PROX1,SOX11,FZD5,CELSR1,BNC2,SOBP,CHD7,PRDM16,CCM2,OSR1,LAMA1
2_Member	GO Biological Processes	GO:0003205	cardiac chamber development	-3.70606	-1.22102	10/171	182,2263,2535,3091,3516,5629,6092,6664,55636,55742	JAG1,FGFR2,FZD2,HIF1A,RBPJ,PROX1,ROBO2,SOX11,CHD7,PARVA
2_Member	GO Biological Processes	GO:0060562	epithelial tube morphogenesis	-3.57858	-1.15314	14/322	2263,2535,2719,3091,3516,4609,5629,6664,9620,27086,83605,130497,144165,284217	FGFR2,FZD2,GPC3,HIF1A,RBPJ,MYC,PROX1,SOX11,CELSR1,FOXP1,CCM2,OSR1,PRICKLE1,LAMA1
2_Member	GO Biological Processes	GO:0035148	tube formation	-3.51467	-1.1162	9/148	2263,2535,3091,5629,6664,9620,130497,144165,153090	FGFR2,FZD2,HIF1A,PROX1,SOX11,CELSR1,OSR1,PRICKLE1,DAB2IP
2_Member	GO Biological Processes	GO:0042471	ear morphogenesis	-3.49914	-1.11101	8/118	2263,2487,2535,5629,9620,55084,55636,130497	FGFR2,FRZB,FZD2,PROX1,CELSR1,SOBP,CHD7,OSR1
2_Member	GO Biological Processes	GO:0043009	chordate embryonic development	-3.45851	-1.08545	21/629	1956,2263,2535,3091,3516,4010,5362,5629,6664,7855,9394,9620,10159,55636,56243,64131,83605,130497,144165,149473,286204	EGFR,FGFR2,FZD2,HIF1A,RBPJ,LMX1B,PLXNA2,PROX1,SOX11,FZD5,HS6ST1,CELSR1,ATP6AP2,CHD7,KIAA1217,XYLT1,CCM2,OSR1,PRICKLE1,CCDC24,CRB2
2_Member	GO Biological Processes	GO:0048598	embryonic morphogenesis	-3.44049	-1.07255	20/586	1387,2263,2335,2487,2535,2719,3091,5629,6664,7704,7855,8091,9620,55084,55614,55636,80144,130497,144165,286204	CREBBP,FGFR2,FN1,FRZB,FZD2,GPC3,HIF1A,PROX1,SOX11,ZBTB16,FZD5,HMGA2,CELSR1,SOBP,KIF16B,CHD7,FRAS1,OSR1,PRICKLE1,CRB2
2_Member	GO Biological Processes	GO:0090596	sensory organ morphogenesis	-3.43585	-1.07255	12/256	182,2263,2487,2535,3091,5629,6664,7855,9620,55084,55636,130497	JAG1,FGFR2,FRZB,FZD2,HIF1A,PROX1,SOX11,FZD5,CELSR1,SOBP,CHD7,OSR1
2_Member	GO Biological Processes	GO:0007507	heart development	-3.42169	-1.06319	20/588	182,1956,2263,2535,2719,3091,3399,3516,3720,5629,6092,6664,51196,55636,55717,55742,79602,83605,130497,144165	JAG1,EGFR,FGFR2,FZD2,GPC3,HIF1A,ID3,RBPJ,JARID2,PROX1,ROBO2,SOX11,PLCE1,CHD7,WDR11,PARVA,ADIPOR2,CCM2,OSR1,PRICKLE1
2_Member	GO Biological Processes	GO:0009792	embryo development ending in birth or egg hatching	-3.3074	-0.981085	21/646	1956,2263,2535,3091,3516,4010,5362,5629,6664,7855,9394,9620,10159,55636,56243,64131,83605,130497,144165,149473,286204	EGFR,FGFR2,FZD2,HIF1A,RBPJ,LMX1B,PLXNA2,PROX1,SOX11,FZD5,HS6ST1,CELSR1,ATP6AP2,CHD7,KIAA1217,XYLT1,CCM2,OSR1,PRICKLE1,CCDC24,CRB2
2_Member	GO Biological Processes	GO:0042472	inner ear morphogenesis	-3.26247	-0.94493	7/98	2263,2487,2535,5629,9620,55084,55636	FGFR2,FRZB,FZD2,PROX1,CELSR1,SOBP,CHD7
2_Member	GO Biological Processes	GO:0060840	artery development	-3.20972	-0.910409	7/100	182,3516,4638,5629,6092,55636,144165	JAG1,RBPJ,MYLK,PROX1,ROBO2,CHD7,PRICKLE1
2_Member	GO Biological Processes	GO:0072175	epithelial tube formation	-3.1735	-0.904479	8/132	2263,2535,3091,5629,6664,9620,130497,144165	FGFR2,FZD2,HIF1A,PROX1,SOX11,CELSR1,OSR1,PRICKLE1
2_Member	GO Biological Processes	GO:0003281	ventricular septum development	-3.12619	-0.887067	6/75	2263,2535,3516,5629,6092,6664	FGFR2,FZD2,RBPJ,PROX1,ROBO2,SOX11
2_Member	GO Biological Processes	GO:0061061	muscle structure development	-3.07248	-0.85688	21/674	182,575,1496,2263,2353,2535,3399,3516,3720,4638,5629,6664,6840,7345,7402,8038,10753,55636,57190,144165,494470	JAG1,ADGRB1,CTNNA2,FGFR2,FOS,FZD2,ID3,RBPJ,JARID2,MYLK,PROX1,SOX11,SVIL,UCHL1,UTRN,ADAM12,CAPN9,CHD7,SELENON,PRICKLE1,RNF165
2_Member	GO Biological Processes	GO:0048562	embryonic organ morphogenesis	-2.98606	-0.798855	12/288	2263,2487,2535,3091,5629,6664,7855,9620,55084,55636,130497,286204	FGFR2,FRZB,FZD2,HIF1A,PROX1,SOX11,FZD5,CELSR1,SOBP,CHD7,OSR1,CRB2
2_Member	GO Biological Processes	GO:0110110	positive regulation of animal organ morphogenesis	-2.95017	-0.784913	6/81	182,2263,3516,4609,6092,6431	JAG1,FGFR2,RBPJ,MYC,ROBO2,SRSF6
2_Member	GO Biological Processes	GO:0002065	columnar/cuboidal epithelial cell differentiation	-2.9186	-0.777154	7/112	182,2263,3091,3516,5629,6664,56975	JAG1,FGFR2,HIF1A,RBPJ,PROX1,SOX11,FAM20C
2_Member	GO Biological Processes	GO:0060415	muscle tissue morphogenesis	-2.89499	-0.759291	6/83	2263,2535,3516,4638,5629,55636	FGFR2,FZD2,RBPJ,MYLK,PROX1,CHD7
2_Member	GO Biological Processes	GO:0048644	muscle organ morphogenesis	-2.73879	-0.66922	6/89	2263,2535,3516,4638,5629,55636	FGFR2,FZD2,RBPJ,MYLK,PROX1,CHD7
2_Member	GO Biological Processes	GO:0021915	neural tube development	-2.63846	-0.626267	8/160	2535,3091,5362,5629,6664,9620,10159,144165	FZD2,HIF1A,PLXNA2,PROX1,SOX11,CELSR1,ATP6AP2,PRICKLE1
2_Member	GO Biological Processes	GO:0007517	muscle organ development	-2.57211	-0.589022	14/410	575,2263,2353,2535,3399,3516,3720,4638,5629,6664,6840,7402,55636,57190	ADGRB1,FGFR2,FOS,FZD2,ID3,RBPJ,JARID2,MYLK,PROX1,SOX11,SVIL,UTRN,CHD7,SELENON
2_Member	GO Biological Processes	GO:0003177	pulmonary valve development	-2.48783	-0.557678	3/21	182,3516,6092	JAG1,RBPJ,ROBO2
2_Member	GO Biological Processes	GO:0001974	blood vessel remodeling	-2.40211	-0.505108	4/45	182,3516,55636,64114	JAG1,RBPJ,CHD7,TMBIM1
2_Member	GO Biological Processes	GO:0003007	heart morphogenesis	-2.33123	-0.470053	10/260	182,2263,2535,3091,3516,5629,6092,6664,55636,55742	JAG1,FGFR2,FZD2,HIF1A,RBPJ,PROX1,ROBO2,SOX11,CHD7,PARVA
2_Member	GO Biological Processes	GO:0048844	artery morphogenesis	-2.31581	-0.469743	5/76	182,3516,4638,5629,55636	JAG1,RBPJ,MYLK,PROX1,CHD7
2_Member	GO Biological Processes	GO:0055010	ventricular cardiac muscle tissue morphogenesis	-2.30082	-0.465049	4/48	2263,3516,5629,55636	FGFR2,RBPJ,PROX1,CHD7
2_Member	GO Biological Processes	GO:0016331	morphogenesis of embryonic epithelium	-2.20939	-0.415499	7/150	2263,2535,3091,6664,9620,130497,144165	FGFR2,FZD2,HIF1A,SOX11,CELSR1,OSR1,PRICKLE1
2_Member	GO Biological Processes	GO:0060563	neuroepithelial cell differentiation	-2.14765	-0.374174	4/53	182,3516,6664,56975	JAG1,RBPJ,SOX11,FAM20C
2_Member	GO Biological Processes	GO:0003229	ventricular cardiac muscle tissue development	-2.09115	-0.33407	4/55	2263,3516,5629,55636	FGFR2,RBPJ,PROX1,CHD7
2_Member	GO Biological Processes	GO:0072132	mesenchyme morphogenesis	-2.09115	-0.33407	4/55	3516,4609,6092,130497	RBPJ,MYC,ROBO2,OSR1
2_Member	GO Biological Processes	GO:0060113	inner ear receptor cell differentiation	-2.06382	-0.320309	4/56	182,2535,3516,5205	JAG1,FZD2,RBPJ,ATP8B1
2_Member	GO Biological Processes	GO:0001838	embryonic epithelial tube formation	-2.03408	-0.299816	6/124	2535,3091,6664,9620,130497,144165	FZD2,HIF1A,SOX11,CELSR1,OSR1,PRICKLE1
3_Summary	GO Biological Processes	GO:0060021	roof of mouth development	-6.20198	-2.48734	10/89	2535,6664,25976,54796,55636,59338,63976,80144,91461,130497	FZD2,SOX11,TIPARP,BNC2,CHD7,PLEKHA1,PRDM16,FRAS1,PKDCC,OSR1
3_Member	GO Biological Processes	GO:0060021	roof of mouth development	-6.20198	-2.48734	10/89	2535,6664,25976,54796,55636,59338,63976,80144,91461,130497	FZD2,SOX11,TIPARP,BNC2,CHD7,PLEKHA1,PRDM16,FRAS1,PKDCC,OSR1
3_Member	GO Biological Processes	GO:0062009	secondary palate development	-2.31932	-0.469743	3/24	2535,6664,55636	FZD2,SOX11,CHD7
4_Summary	GO Biological Processes	GO:0072001	renal system development	-5.83481	-2.36015	17/294	182,2263,2719,3399,4072,4609,4811,5629,6092,6664,7704,25976,51196,55165,80144,130497,168002,7337,1387,5362,55636,91461,494470,3516,7855,9620,10159,286204,4010	JAG1,FGFR2,GPC3,ID3,EPCAM,MYC,NID1,PROX1,ROBO2,SOX11,ZBTB16,TIPARP,PLCE1,CEP55,FRAS1,OSR1,DACT2,UBE3A,CREBBP,PLXNA2,CHD7,PKDCC,RNF165,RBPJ,FZD5,CELSR1,ATP6AP2,CRB2,LMX1B
4_Member	GO Biological Processes	GO:0072001	renal system development	-5.83481	-2.36015	17/294	182,2263,2719,3399,4072,4609,4811,5629,6092,6664,7704,25976,51196,55165,80144,130497,168002	JAG1,FGFR2,GPC3,ID3,EPCAM,MYC,NID1,PROX1,ROBO2,SOX11,ZBTB16,TIPARP,PLCE1,CEP55,FRAS1,OSR1,DACT2
4_Member	GO Biological Processes	GO:0001655	urogenital system development	-5.76235	-2.3479	18/331	182,2263,2719,3399,4072,4609,4811,5629,6092,6664,7337,7704,25976,51196,55165,80144,130497,168002	JAG1,FGFR2,GPC3,ID3,EPCAM,MYC,NID1,PROX1,ROBO2,SOX11,UBE3A,ZBTB16,TIPARP,PLCE1,CEP55,FRAS1,OSR1,DACT2
4_Member	GO Biological Processes	GO:0001822	kidney development	-5.47965	-2.20351	16/279	182,2263,2719,3399,4072,4609,4811,5629,6092,6664,7704,25976,51196,80144,130497,168002	JAG1,FGFR2,GPC3,ID3,EPCAM,MYC,NID1,PROX1,ROBO2,SOX11,ZBTB16,TIPARP,PLCE1,FRAS1,OSR1,DACT2
4_Member	GO Biological Processes	GO:0035107	appendage morphogenesis	-4.98068	-2.00556	11/148	1387,2263,2719,5362,6664,7704,55636,80144,91461,130497,494470	CREBBP,FGFR2,GPC3,PLXNA2,SOX11,ZBTB16,CHD7,FRAS1,PKDCC,OSR1,RNF165
4_Member	GO Biological Processes	GO:0035108	limb morphogenesis	-4.98068	-2.00556	11/148	1387,2263,2719,5362,6664,7704,55636,80144,91461,130497,494470	CREBBP,FGFR2,GPC3,PLXNA2,SOX11,ZBTB16,CHD7,FRAS1,PKDCC,OSR1,RNF165
4_Member	GO Biological Processes	GO:0048736	appendage development	-4.21455	-1.46989	11/179	1387,2263,2719,5362,6664,7704,55636,80144,91461,130497,494470	CREBBP,FGFR2,GPC3,PLXNA2,SOX11,ZBTB16,CHD7,FRAS1,PKDCC,OSR1,RNF165
4_Member	GO Biological Processes	GO:0060173	limb development	-4.21455	-1.46989	11/179	1387,2263,2719,5362,6664,7704,55636,80144,91461,130497,494470	CREBBP,FGFR2,GPC3,PLXNA2,SOX11,ZBTB16,CHD7,FRAS1,PKDCC,OSR1,RNF165
4_Member	GO Biological Processes	GO:0072203	cell proliferation involved in metanephros development	-3.48148	-1.09844	3/10	2719,4609,130497	GPC3,MYC,OSR1
4_Member	GO Biological Processes	GO:0035116	embryonic hindlimb morphogenesis	-3.18072	-0.904479	4/28	2719,7704,55636,130497	GPC3,ZBTB16,CHD7,OSR1
4_Member	GO Biological Processes	GO:0001823	mesonephros development	-3.15826	-0.901421	7/102	2263,2719,4072,4609,6092,7704,130497	FGFR2,GPC3,EPCAM,MYC,ROBO2,ZBTB16,OSR1
4_Member	GO Biological Processes	GO:0035137	hindlimb morphogenesis	-2.7611	-0.684362	4/36	2719,7704,55636,130497	GPC3,ZBTB16,CHD7,OSR1
4_Member	GO Biological Processes	GO:0001656	metanephros development	-2.71402	-0.661296	6/90	2719,3399,4609,6092,80144,130497	GPC3,ID3,MYC,ROBO2,FRAS1,OSR1
4_Member	GO Biological Processes	GO:0001657	ureteric bud development	-2.54973	-0.588211	6/97	2263,2719,4072,4609,6092,130497	FGFR2,GPC3,EPCAM,MYC,ROBO2,OSR1
4_Member	GO Biological Processes	GO:0072163	mesonephric epithelium development	-2.52747	-0.571922	6/98	2263,2719,4072,4609,6092,130497	FGFR2,GPC3,EPCAM,MYC,ROBO2,OSR1
4_Member	GO Biological Processes	GO:0072164	mesonephric tubule development	-2.52747	-0.571922	6/98	2263,2719,4072,4609,6092,130497	FGFR2,GPC3,EPCAM,MYC,ROBO2,OSR1
4_Member	GO Biological Processes	GO:0010463	mesenchymal cell proliferation	-2.43766	-0.521516	4/44	2263,2719,4609,130497	FGFR2,GPC3,MYC,OSR1
4_Member	GO Biological Processes	GO:0072111	cell proliferation involved in kidney development	-2.42878	-0.521171	3/22	2719,4609,130497	GPC3,MYC,OSR1
4_Member	GO Biological Processes	GO:0072073	kidney epithelium development	-2.37109	-0.48702	7/140	182,2263,2719,4072,4609,6092,130497	JAG1,FGFR2,GPC3,EPCAM,MYC,ROBO2,OSR1
4_Member	GO Biological Processes	GO:0009952	anterior/posterior pattern specification	-2.33158	-0.470053	9/219	2719,3516,5362,7704,7855,9620,10159,130497,286204	GPC3,RBPJ,PLXNA2,ZBTB16,FZD5,CELSR1,ATP6AP2,OSR1,CRB2
4_Member	GO Biological Processes	GO:0003002	regionalization	-2.28337	-0.453443	12/351	2263,2719,3516,4010,5362,6092,7704,7855,9620,10159,130497,286204	FGFR2,GPC3,RBPJ,LMX1B,PLXNA2,ROBO2,ZBTB16,FZD5,CELSR1,ATP6AP2,OSR1,CRB2
4_Member	GO Biological Processes	GO:0030326	embryonic limb morphogenesis	-2.01786	-0.290267	6/125	1387,2719,7704,55636,80144,130497	CREBBP,GPC3,ZBTB16,CHD7,FRAS1,OSR1
4_Member	GO Biological Processes	GO:0035113	embryonic appendage morphogenesis	-2.01786	-0.290267	6/125	1387,2719,7704,55636,80144,130497	CREBBP,GPC3,ZBTB16,CHD7,FRAS1,OSR1
5_Summary	GO Biological Processes	GO:0048812	neuron projection morphogenesis	-5.52567	-2.20351	26/648	288,575,1496,1501,1630,1956,2263,2335,4147,4684,5362,6092,6446,7337,7345,8428,8633,22903,26037,26053,84894,114804,153090,219699,284217,494470,5629,55604,55742,55920,168002,2185,5205,6453,23216,23224,23251,55357,55633,114788,8440,1741,3556,7402,7534,7855,182,3399,6664	ANK3,ADGRB1,CTNNA2,CTNND2,DCC,EGFR,FGFR2,FN1,MATN2,NCAM1,PLXNA2,ROBO2,SGK1,UBE3A,UCHL1,STK24,UNC5C,BTBD3,SIPA1L1,AUTS2,LINGO1,RNF157,DAB2IP,UNC5B,LAMA1,RNF165,PROX1,CARMIL1,PARVA,RCC2,DACT2,PTK2B,ATP8B1,ITSN1,TBC1D1,SYNE2,MINAR1,TBC1D2,TBC1D22B,CSMD3,NCK2,DLG3,IL1RAP,UTRN,YWHAZ,FZD5,JAG1,ID3,SOX11
5_Member	GO Biological Processes	GO:0048812	neuron projection morphogenesis	-5.52567	-2.20351	26/648	288,575,1496,1501,1630,1956,2263,2335,4147,4684,5362,6092,6446,7337,7345,8428,8633,22903,26037,26053,84894,114804,153090,219699,284217,494470	ANK3,ADGRB1,CTNNA2,CTNND2,DCC,EGFR,FGFR2,FN1,MATN2,NCAM1,PLXNA2,ROBO2,SGK1,UBE3A,UCHL1,STK24,UNC5C,BTBD3,SIPA1L1,AUTS2,LINGO1,RNF157,DAB2IP,UNC5B,LAMA1,RNF165
5_Member	GO Biological Processes	GO:0120039	plasma membrane bounded cell projection morphogenesis	-5.35896	-2.15536	26/662	288,575,1496,1501,1630,1956,2263,2335,4147,4684,5362,6092,6446,7337,7345,8428,8633,22903,26037,26053,84894,114804,153090,219699,284217,494470	ANK3,ADGRB1,CTNNA2,CTNND2,DCC,EGFR,FGFR2,FN1,MATN2,NCAM1,PLXNA2,ROBO2,SGK1,UBE3A,UCHL1,STK24,UNC5C,BTBD3,SIPA1L1,AUTS2,LINGO1,RNF157,DAB2IP,UNC5B,LAMA1,RNF165
5_Member	GO Biological Processes	GO:0048858	cell projection morphogenesis	-5.3123	-2.14088	26/666	288,575,1496,1501,1630,1956,2263,2335,4147,4684,5362,6092,6446,7337,7345,8428,8633,22903,26037,26053,84894,114804,153090,219699,284217,494470	ANK3,ADGRB1,CTNNA2,CTNND2,DCC,EGFR,FGFR2,FN1,MATN2,NCAM1,PLXNA2,ROBO2,SGK1,UBE3A,UCHL1,STK24,UNC5C,BTBD3,SIPA1L1,AUTS2,LINGO1,RNF157,DAB2IP,UNC5B,LAMA1,RNF165
5_Member	GO Biological Processes	GO:0032990	cell part morphogenesis	-5.09636	-2.05758	26/685	288,575,1496,1501,1630,1956,2263,2335,4147,4684,5362,6092,6446,7337,7345,8428,8633,22903,26037,26053,84894,114804,153090,219699,284217,494470	ANK3,ADGRB1,CTNNA2,CTNND2,DCC,EGFR,FGFR2,FN1,MATN2,NCAM1,PLXNA2,ROBO2,SGK1,UBE3A,UCHL1,STK24,UNC5C,BTBD3,SIPA1L1,AUTS2,LINGO1,RNF157,DAB2IP,UNC5B,LAMA1,RNF165
5_Member	GO Biological Processes	GO:0000904	cell morphogenesis involved in differentiation	-4.47146	-1.61631	26/745	288,575,1496,1501,1630,2263,2335,4147,4684,5362,5629,6092,7337,7345,8633,22903,26037,26053,55604,55742,55920,84894,168002,219699,284217,494470	ANK3,ADGRB1,CTNNA2,CTNND2,DCC,FGFR2,FN1,MATN2,NCAM1,PLXNA2,PROX1,ROBO2,UBE3A,UCHL1,UNC5C,BTBD3,SIPA1L1,AUTS2,CARMIL1,PARVA,RCC2,LINGO1,DACT2,UNC5B,LAMA1,RNF165
5_Member	GO Biological Processes	GO:0048667	cell morphogenesis involved in neuron differentiation	-3.90289	-1.28432	21/583	288,575,1496,1501,1630,2263,2335,4147,4684,5362,6092,7337,7345,8633,22903,26037,26053,84894,219699,284217,494470	ANK3,ADGRB1,CTNNA2,CTNND2,DCC,FGFR2,FN1,MATN2,NCAM1,PLXNA2,ROBO2,UBE3A,UCHL1,UNC5C,BTBD3,SIPA1L1,AUTS2,LINGO1,UNC5B,LAMA1,RNF165
5_Member	GO Biological Processes	GO:0007409	axonogenesis	-3.76722	-1.23347	18/468	288,575,1496,1630,2263,2335,4147,4684,5362,6092,7345,8633,26037,26053,84894,219699,284217,494470	ANK3,ADGRB1,CTNNA2,DCC,FGFR2,FN1,MATN2,NCAM1,PLXNA2,ROBO2,UCHL1,UNC5C,SIPA1L1,AUTS2,LINGO1,UNC5B,LAMA1,RNF165
5_Member	GO Biological Processes	GO:0061564	axon development	-3.72494	-1.23347	19/514	288,575,1496,1630,2263,2335,4147,4684,5362,6092,7345,8428,8633,26037,26053,84894,219699,284217,494470	ANK3,ADGRB1,CTNNA2,DCC,FGFR2,FN1,MATN2,NCAM1,PLXNA2,ROBO2,UCHL1,STK24,UNC5C,SIPA1L1,AUTS2,LINGO1,UNC5B,LAMA1,RNF165
5_Member	GO Biological Processes	GO:0120035	regulation of plasma membrane bounded cell projection organization	-3.65469	-1.19448	23/698	1496,1630,2185,2335,5205,5362,6092,6453,7337,8428,23216,23224,23251,26037,26053,55357,55604,55633,55920,84894,114788,114804,153090	CTNNA2,DCC,PTK2B,FN1,ATP8B1,PLXNA2,ROBO2,ITSN1,UBE3A,STK24,TBC1D1,SYNE2,MINAR1,SIPA1L1,AUTS2,TBC1D2,CARMIL1,TBC1D22B,RCC2,LINGO1,CSMD3,RNF157,DAB2IP
5_Member	GO Biological Processes	GO:0031344	regulation of cell projection organization	-3.56693	-1.14701	23/708	1496,1630,2185,2335,5205,5362,6092,6453,7337,8428,23216,23224,23251,26037,26053,55357,55604,55633,55920,84894,114788,114804,153090	CTNNA2,DCC,PTK2B,FN1,ATP8B1,PLXNA2,ROBO2,ITSN1,UBE3A,STK24,TBC1D1,SYNE2,MINAR1,SIPA1L1,AUTS2,TBC1D2,CARMIL1,TBC1D22B,RCC2,LINGO1,CSMD3,RNF157,DAB2IP
5_Member	GO Biological Processes	GO:0016358	dendrite development	-3.22075	-0.911809	11/233	1496,1501,1630,4147,6453,7337,8440,22903,26037,114788,153090	CTNNA2,CTNND2,DCC,MATN2,ITSN1,UBE3A,NCK2,BTBD3,SIPA1L1,CSMD3,DAB2IP
5_Member	GO Biological Processes	GO:0050808	synapse organization	-2.59123	-0.597295	14/408	288,575,1496,1501,1741,3556,6092,6453,7337,7402,7534,7855,26037,153090	ANK3,ADGRB1,CTNNA2,CTNND2,DLG3,IL1RAP,ROBO2,ITSN1,UBE3A,UTRN,YWHAZ,FZD5,SIPA1L1,DAB2IP
5_Member	GO Biological Processes	GO:0045664	regulation of neuron differentiation	-2.47904	-0.550666	19/656	182,1496,1630,2185,2335,3399,5362,5629,6092,6453,6664,7337,8428,23251,26037,84894,114788,114804,153090	JAG1,CTNNA2,DCC,PTK2B,FN1,ID3,PLXNA2,PROX1,ROBO2,ITSN1,SOX11,UBE3A,STK24,MINAR1,SIPA1L1,LINGO1,CSMD3,RNF157,DAB2IP
5_Member	GO Biological Processes	GO:0050807	regulation of synapse organization	-2.34442	-0.474042	9/218	575,1496,3556,6092,6453,7337,7534,26037,153090	ADGRB1,CTNNA2,IL1RAP,ROBO2,ITSN1,UBE3A,YWHAZ,SIPA1L1,DAB2IP
5_Member	GO Biological Processes	GO:0050803	regulation of synapse structure or activity	-2.23175	-0.42423	9/227	575,1496,3556,6092,6453,7337,7534,26037,153090	ADGRB1,CTNNA2,IL1RAP,ROBO2,ITSN1,UBE3A,YWHAZ,SIPA1L1,DAB2IP
5_Member	GO Biological Processes	GO:0010975	regulation of neuron projection development	-2.2067	-0.415499	15/499	1496,1630,2185,2335,5362,6092,6453,7337,8428,23251,26037,84894,114788,114804,153090	CTNNA2,DCC,PTK2B,FN1,PLXNA2,ROBO2,ITSN1,UBE3A,STK24,MINAR1,SIPA1L1,LINGO1,CSMD3,RNF157,DAB2IP
6_Summary	GO Biological Processes	GO:0060322	head development	-5.48239	-2.20351	29/777	306,471,1496,1500,1956,2263,3091,3176,3516,5362,5629,6092,6453,6594,7337,8633,10159,10971,22903,23224,25976,55636,55717,59338,64426,79109,83943,89927,153090,4147,6347	ANXA3,ATIC,CTNNA2,CTNND1,EGFR,FGFR2,HIF1A,HNMT,RBPJ,PLXNA2,PROX1,ROBO2,ITSN1,SMARCA1,UBE3A,UNC5C,ATP6AP2,YWHAQ,BTBD3,SYNE2,TIPARP,CHD7,WDR11,PLEKHA1,SUDS3,MAPKAP1,IMMP2L,BMERB1,DAB2IP,MATN2,CCL2
6_Member	GO Biological Processes	GO:0060322	head development	-5.48239	-2.20351	29/777	306,471,1496,1500,1956,2263,3091,3176,3516,5362,5629,6092,6453,6594,7337,8633,10159,10971,22903,23224,25976,55636,55717,59338,64426,79109,83943,89927,153090	ANXA3,ATIC,CTNNA2,CTNND1,EGFR,FGFR2,HIF1A,HNMT,RBPJ,PLXNA2,PROX1,ROBO2,ITSN1,SMARCA1,UBE3A,UNC5C,ATP6AP2,YWHAQ,BTBD3,SYNE2,TIPARP,CHD7,WDR11,PLEKHA1,SUDS3,MAPKAP1,IMMP2L,BMERB1,DAB2IP
6_Member	GO Biological Processes	GO:0007420	brain development	-4.15117	-1.44206	25/734	306,471,1496,1500,1956,2263,3091,3176,3516,5362,5629,6092,6453,6594,7337,8633,10971,22903,23224,55636,64426,79109,83943,89927,153090	ANXA3,ATIC,CTNNA2,CTNND1,EGFR,FGFR2,HIF1A,HNMT,RBPJ,PLXNA2,PROX1,ROBO2,ITSN1,SMARCA1,UBE3A,UNC5C,YWHAQ,BTBD3,SYNE2,CHD7,SUDS3,MAPKAP1,IMMP2L,BMERB1,DAB2IP
6_Member	GO Biological Processes	GO:0021814	cell motility involved in cerebral cortex radial glia guided migration	-3.80315	-1.24149	3/8	23224,89927,153090	SYNE2,BMERB1,DAB2IP
6_Member	GO Biological Processes	GO:0008347	glial cell migration	-3.16512	-0.904479	5/49	4147,6347,23224,89927,153090	MATN2,CCL2,SYNE2,BMERB1,DAB2IP
6_Member	GO Biological Processes	GO:0021543	pallium development	-3.04222	-0.831894	9/172	306,471,1956,3091,5629,22903,23224,89927,153090	ANXA3,ATIC,EGFR,HIF1A,PROX1,BTBD3,SYNE2,BMERB1,DAB2IP
6_Member	GO Biological Processes	GO:0021537	telencephalon development	-2.92887	-0.777154	11/253	306,471,1956,3091,5629,6092,22903,23224,55636,89927,153090	ANXA3,ATIC,EGFR,HIF1A,PROX1,ROBO2,BTBD3,SYNE2,CHD7,BMERB1,DAB2IP
6_Member	GO Biological Processes	GO:0021987	cerebral cortex development	-2.83017	-0.714024	7/116	471,1956,3091,22903,23224,89927,153090	ATIC,EGFR,HIF1A,BTBD3,SYNE2,BMERB1,DAB2IP
6_Member	GO Biological Processes	GO:0021795	cerebral cortex cell migration	-2.47416	-0.547558	4/43	1956,23224,89927,153090	EGFR,SYNE2,BMERB1,DAB2IP
6_Member	GO Biological Processes	GO:0021801	cerebral cortex radial glia guided migration	-2.42878	-0.521171	3/22	23224,89927,153090	SYNE2,BMERB1,DAB2IP
6_Member	GO Biological Processes	GO:0022030	telencephalon glial cell migration	-2.42878	-0.521171	3/22	23224,89927,153090	SYNE2,BMERB1,DAB2IP
6_Member	GO Biological Processes	GO:0030900	forebrain development	-2.41372	-0.510253	13/382	306,471,1956,2263,3091,3516,5629,6092,22903,23224,55636,89927,153090	ANXA3,ATIC,EGFR,FGFR2,HIF1A,RBPJ,PROX1,ROBO2,BTBD3,SYNE2,CHD7,BMERB1,DAB2IP
6_Member	GO Biological Processes	GO:0021799	cerebral cortex radially oriented cell migration	-2.08576	-0.33407	3/29	23224,89927,153090	SYNE2,BMERB1,DAB2IP
6_Member	GO Biological Processes	GO:0022029	telencephalon cell migration	-2.01089	-0.285642	4/58	1956,23224,89927,153090	EGFR,SYNE2,BMERB1,DAB2IP
7_Summary	GO Biological Processes	GO:0060541	respiratory system development	-5.18663	-2.05758	13/198	1717,1956,2263,2719,3516,5629,6431,6664,9394,9620,55636,91461,284217,3091,4609,57608,130497,6347,51146,153090,55612	DHCR7,EGFR,FGFR2,GPC3,RBPJ,PROX1,SRSF6,SOX11,HS6ST1,CELSR1,CHD7,PKDCC,LAMA1,HIF1A,MYC,JCAD,OSR1,CCL2,A4GNT,DAB2IP,FERMT1
7_Member	GO Biological Processes	GO:0060541	respiratory system development	-5.18663	-2.05758	13/198	1717,1956,2263,2719,3516,5629,6431,6664,9394,9620,55636,91461,284217	DHCR7,EGFR,FGFR2,GPC3,RBPJ,PROX1,SRSF6,SOX11,HS6ST1,CELSR1,CHD7,PKDCC,LAMA1
7_Member	GO Biological Processes	GO:0030324	lung development	-5.0988	-2.05758	12/172	1717,1956,2263,2719,3516,5629,6431,6664,9394,9620,91461,284217	DHCR7,EGFR,FGFR2,GPC3,RBPJ,PROX1,SRSF6,SOX11,HS6ST1,CELSR1,PKDCC,LAMA1
7_Member	GO Biological Processes	GO:0030323	respiratory tube development	-4.9973	-2.00556	12/176	1717,1956,2263,2719,3516,5629,6431,6664,9394,9620,91461,284217	DHCR7,EGFR,FGFR2,GPC3,RBPJ,PROX1,SRSF6,SOX11,HS6ST1,CELSR1,PKDCC,LAMA1
7_Member	GO Biological Processes	GO:0060425	lung morphogenesis	-3.12445	-0.887067	5/50	2263,6431,6664,9620,284217	FGFR2,SRSF6,SOX11,CELSR1,LAMA1
7_Member	GO Biological Processes	GO:0050679	positive regulation of epithelial cell proliferation	-2.50542	-0.562626	9/206	1956,2263,3091,4609,5629,6431,6664,57608,130497	EGFR,FGFR2,HIF1A,MYC,PROX1,SRSF6,SOX11,JCAD,OSR1
7_Member	GO Biological Processes	GO:0050678	regulation of epithelial cell proliferation	-2.35741	-0.482354	13/388	1956,2263,2719,3091,4609,5629,6347,6431,6664,51146,57608,130497,153090	EGFR,FGFR2,GPC3,HIF1A,MYC,PROX1,CCL2,SRSF6,SOX11,A4GNT,JCAD,OSR1,DAB2IP
7_Member	GO Biological Processes	GO:0048546	digestive tract morphogenesis	-2.26871	-0.453292	4/49	1956,2263,3091,6664	EGFR,FGFR2,HIF1A,SOX11
7_Member	GO Biological Processes	GO:0060571	morphogenesis of an epithelial fold	-2.26841	-0.453292	3/25	1956,2263,3091	EGFR,FGFR2,HIF1A
7_Member	GO Biological Processes	GO:0050673	epithelial cell proliferation	-2.25179	-0.439396	14/446	1956,2263,2719,3091,4609,5629,6347,6431,6664,51146,55612,57608,130497,153090	EGFR,FGFR2,GPC3,HIF1A,MYC,PROX1,CCL2,SRSF6,SOX11,A4GNT,FERMT1,JCAD,OSR1,DAB2IP
7_Member	GO Biological Processes	GO:0060441	epithelial tube branching involved in lung morphogenesis	-2.08576	-0.33407	3/29	2263,9620,284217	FGFR2,CELSR1,LAMA1
8_Summary	GO Biological Processes	GO:0030513	positive regulation of BMP signaling pathway	-5.16554	-2.05758	6/33	2719,3516,6664,23090,286204,494470,1387,3091,25805,55612,56975,57608,63976,153090,306,1956,2263,2353,4609,6347,7073,7337,8895,55614,168002	GPC3,RBPJ,SOX11,ZNF423,CRB2,RNF165,CREBBP,HIF1A,BAMBI,FERMT1,FAM20C,JCAD,PRDM16,DAB2IP,ANXA3,EGFR,FGFR2,FOS,MYC,CCL2,TIAL1,UBE3A,CPNE3,KIF16B,DACT2
8_Member	GO Biological Processes	GO:0030513	positive regulation of BMP signaling pathway	-5.16554	-2.05758	6/33	2719,3516,6664,23090,286204,494470	GPC3,RBPJ,SOX11,ZNF423,CRB2,RNF165
8_Member	GO Biological Processes	GO:0090287	regulation of cellular response to growth factor stimulus	-4.003	-1.34782	14/293	1387,2719,3091,3516,6664,23090,25805,55612,56975,57608,63976,153090,286204,494470	CREBBP,GPC3,HIF1A,RBPJ,SOX11,ZNF423,BAMBI,FERMT1,FAM20C,JCAD,PRDM16,DAB2IP,CRB2,RNF165
8_Member	GO Biological Processes	GO:0090100	positive regulation of transmembrane receptor protein serine/threonine kinase signaling pathway	-3.87699	-1.26702	8/104	1387,2719,3516,6664,23090,55612,286204,494470	CREBBP,GPC3,RBPJ,SOX11,ZNF423,FERMT1,CRB2,RNF165
8_Member	GO Biological Processes	GO:0070848	response to growth factor	-3.69683	-1.22033	24/739	306,1387,1956,2263,2353,2719,3091,3516,4609,6347,6664,7073,7337,8895,23090,25805,55612,55614,56975,57608,63976,153090,286204,494470	ANXA3,CREBBP,EGFR,FGFR2,FOS,GPC3,HIF1A,RBPJ,MYC,CCL2,SOX11,TIAL1,UBE3A,CPNE3,ZNF423,BAMBI,FERMT1,KIF16B,FAM20C,JCAD,PRDM16,DAB2IP,CRB2,RNF165
8_Member	GO Biological Processes	GO:0071363	cellular response to growth factor stimulus	-3.16989	-0.904479	22/709	1387,1956,2263,2353,2719,3091,3516,6347,6664,7073,7337,8895,23090,25805,55612,55614,56975,57608,63976,153090,286204,494470	CREBBP,EGFR,FGFR2,FOS,GPC3,HIF1A,RBPJ,CCL2,SOX11,TIAL1,UBE3A,CPNE3,ZNF423,BAMBI,FERMT1,KIF16B,FAM20C,JCAD,PRDM16,DAB2IP,CRB2,RNF165
8_Member	GO Biological Processes	GO:0090092	regulation of transmembrane receptor protein serine/threonine kinase signaling pathway	-3.07062	-0.85688	11/243	1387,2719,3516,6664,23090,25805,55612,63976,168002,286204,494470	CREBBP,GPC3,RBPJ,SOX11,ZNF423,BAMBI,FERMT1,PRDM16,DACT2,CRB2,RNF165
8_Member	GO Biological Processes	GO:0030510	regulation of BMP signaling pathway	-2.68959	-0.653214	6/91	2719,3516,6664,23090,286204,494470	GPC3,RBPJ,SOX11,ZNF423,CRB2,RNF165
8_Member	GO Biological Processes	GO:0007178	transmembrane receptor protein serine/threonine kinase signaling pathway	-2.26425	-0.450499	12/353	1387,2353,2719,3516,6664,23090,25805,55612,63976,168002,286204,494470	CREBBP,FOS,GPC3,RBPJ,SOX11,ZNF423,BAMBI,FERMT1,PRDM16,DACT2,CRB2,RNF165
9_Summary	GO Biological Processes	GO:0038127	ERBB signaling pathway	-5.12308	-2.05758	11/143	1956,2185,3516,8440,8895,51196,55614,79643,89853,93343,153090,2263,3091,4919,6453,7073,8651,9844,25976,26037,51606,56975,57608,59338	EGFR,PTK2B,RBPJ,NCK2,CPNE3,PLCE1,KIF16B,CHMP6,MVB12B,MVB12A,DAB2IP,FGFR2,HIF1A,ROR1,ITSN1,TIAL1,SOCS1,ELMO1,TIPARP,SIPA1L1,ATP6V1H,FAM20C,JCAD,PLEKHA1
9_Member	GO Biological Processes	GO:0038127	ERBB signaling pathway	-5.12308	-2.05758	11/143	1956,2185,3516,8440,8895,51196,55614,79643,89853,93343,153090	EGFR,PTK2B,RBPJ,NCK2,CPNE3,PLCE1,KIF16B,CHMP6,MVB12B,MVB12A,DAB2IP
9_Member	GO Biological Processes	GO:0007173	epidermal growth factor receptor signaling pathway	-4.20765	-1.46989	9/120	1956,2185,8440,51196,55614,79643,89853,93343,153090	EGFR,PTK2B,NCK2,PLCE1,KIF16B,CHMP6,MVB12B,MVB12A,DAB2IP
9_Member	GO Biological Processes	GO:0007169	transmembrane receptor protein tyrosine kinase signaling pathway	-3.84701	-1.26187	24/722	1956,2185,2263,3091,3516,4919,6453,7073,8440,8651,8895,9844,25976,26037,51196,51606,55614,56975,57608,59338,79643,89853,93343,153090	EGFR,PTK2B,FGFR2,HIF1A,RBPJ,ROR1,ITSN1,TIAL1,NCK2,SOCS1,CPNE3,ELMO1,TIPARP,SIPA1L1,PLCE1,ATP6V1H,KIF16B,FAM20C,JCAD,PLEKHA1,CHMP6,MVB12B,MVB12A,DAB2IP
9_Member	GO Biological Processes	GO:1901184	regulation of ERBB signaling pathway	-3.40036	-1.0513	7/93	1956,3516,8440,79643,89853,93343,153090	EGFR,RBPJ,NCK2,CHMP6,MVB12B,MVB12A,DAB2IP
9_Member	GO Biological Processes	GO:0042058	regulation of epidermal growth factor receptor signaling pathway	-2.81521	-0.703717	6/86	1956,8440,79643,89853,93343,153090	EGFR,NCK2,CHMP6,MVB12B,MVB12A,DAB2IP
9_Member	GO Biological Processes	GO:0046755	viral budding	-2.21976	-0.422052	3/26	79643,89853,93343	CHMP6,MVB12B,MVB12A
9_Member	Reactome Gene Sets	R-HSA-162588	Budding and maturation of HIV virion	-2.08576	-0.33407	3/29	79643,89853,93343	CHMP6,MVB12B,MVB12A
9_Member	Reactome Gene Sets	R-HSA-9615710	Microautophagy	-2.08576	-0.33407	3/29	79643,89853,93343	CHMP6,MVB12B,MVB12A
10_Summary	GO Biological Processes	GO:0060485	mesenchyme development	-4.83963	-1.88382	15/279	182,2263,2335,2487,3091,3516,4609,6092,6664,8091,25805,54796,130497,153090,286204,3720,4072,144165,55612	JAG1,FGFR2,FN1,FRZB,HIF1A,RBPJ,MYC,ROBO2,SOX11,HMGA2,BAMBI,BNC2,OSR1,DAB2IP,CRB2,JARID2,EPCAM,PRICKLE1,FERMT1
10_Member	GO Biological Processes	GO:0060485	mesenchyme development	-4.83963	-1.88382	15/279	182,2263,2335,2487,3091,3516,4609,6092,6664,8091,25805,54796,130497,153090,286204	JAG1,FGFR2,FN1,FRZB,HIF1A,RBPJ,MYC,ROBO2,SOX11,HMGA2,BAMBI,BNC2,OSR1,DAB2IP,CRB2
10_Member	GO Biological Processes	GO:0048762	mesenchymal cell differentiation	-4.02638	-1.34782	12/221	182,2263,2335,2487,3091,3516,6664,8091,25805,130497,153090,286204	JAG1,FGFR2,FN1,FRZB,HIF1A,RBPJ,SOX11,HMGA2,BAMBI,OSR1,DAB2IP,CRB2
10_Member	GO Biological Processes	GO:0048863	stem cell differentiation	-3.40547	-1.05171	12/258	182,2263,2335,2487,3091,3516,3720,4072,6664,8091,130497,144165	JAG1,FGFR2,FN1,FRZB,HIF1A,RBPJ,JARID2,EPCAM,SOX11,HMGA2,OSR1,PRICKLE1
10_Member	GO Biological Processes	GO:0001837	epithelial to mesenchymal transition	-2.96672	-0.792194	8/142	182,2263,3091,3516,8091,25805,153090,286204	JAG1,FGFR2,HIF1A,RBPJ,HMGA2,BAMBI,DAB2IP,CRB2
10_Member	GO Biological Processes	GO:2000648	positive regulation of stem cell proliferation	-2.63081	-0.622896	4/39	3091,4072,6664,8091	HIF1A,EPCAM,SOX11,HMGA2
10_Member	GO Biological Processes	GO:0072091	regulation of stem cell proliferation	-2.46918	-0.544336	5/70	3091,4072,6664,8091,55612	HIF1A,EPCAM,SOX11,HMGA2,FERMT1
10_Member	GO Biological Processes	GO:0072089	stem cell proliferation	-2.10075	-0.335878	6/120	2263,3091,4072,6664,8091,55612	FGFR2,HIF1A,EPCAM,SOX11,HMGA2,FERMT1
11_Summary	Reactome Gene Sets	R-HSA-8941856	RUNX3 regulates NOTCH signaling	-4.42235	-1.60668	4/14	182,1387,3516,84441,3091,4609,9612,6092,81619,8038,1004,1956,23090,1081,2353,2263,2335,7855,8325,79109,153090,7534	JAG1,CREBBP,RBPJ,MAML2,HIF1A,MYC,NCOR2,ROBO2,TSPAN14,ADAM12,CDH6,EGFR,ZNF423,CGA,FOS,FGFR2,FN1,FZD5,FZD8,MAPKAP1,DAB2IP,YWHAZ
11_Member	Reactome Gene Sets	R-HSA-8941856	RUNX3 regulates NOTCH signaling	-4.42235	-1.60668	4/14	182,1387,3516,84441	JAG1,CREBBP,RBPJ,MAML2
11_Member	Reactome Gene Sets	R-HSA-2122947	NOTCH1 Intracellular Domain Regulates Transcription	-4.25268	-1.46989	6/47	1387,3091,3516,4609,9612,84441	CREBBP,HIF1A,RBPJ,MYC,NCOR2,MAML2
11_Member	Reactome Gene Sets	R-HSA-1980143	Signaling by NOTCH1	-4.05834	-1.36405	7/73	182,1387,3091,3516,4609,9612,84441	JAG1,CREBBP,HIF1A,RBPJ,MYC,NCOR2,MAML2
11_Member	GO Biological Processes	GO:0045747	positive regulation of Notch signaling pathway	-3.90825	-1.28432	6/54	182,1387,3516,6092,81619,84441	JAG1,CREBBP,RBPJ,ROBO2,TSPAN14,MAML2
11_Member	Reactome Gene Sets	R-HSA-2644602	Signaling by NOTCH1 PEST Domain Mutants in Cancer	-3.73411	-1.23347	6/58	182,1387,3516,4609,9612,84441	JAG1,CREBBP,RBPJ,MYC,NCOR2,MAML2
11_Member	Reactome Gene Sets	R-HSA-2644603	Signaling by NOTCH1 in Cancer	-3.73411	-1.23347	6/58	182,1387,3516,4609,9612,84441	JAG1,CREBBP,RBPJ,MYC,NCOR2,MAML2
11_Member	Reactome Gene Sets	R-HSA-2644606	Constitutive Signaling by NOTCH1 PEST Domain Mutants	-3.73411	-1.23347	6/58	182,1387,3516,4609,9612,84441	JAG1,CREBBP,RBPJ,MYC,NCOR2,MAML2
11_Member	Reactome Gene Sets	R-HSA-2894858	Signaling by NOTCH1 HD+PEST Domain Mutants in Cancer	-3.73411	-1.23347	6/58	182,1387,3516,4609,9612,84441	JAG1,CREBBP,RBPJ,MYC,NCOR2,MAML2
11_Member	Reactome Gene Sets	R-HSA-2894862	Constitutive Signaling by NOTCH1 HD+PEST Domain Mutants	-3.73411	-1.23347	6/58	182,1387,3516,4609,9612,84441	JAG1,CREBBP,RBPJ,MYC,NCOR2,MAML2
11_Member	Canonical Pathways	M17	PID NOTCH PATHWAY	-3.69277	-1.22033	6/59	182,3516,4609,8038,9612,84441	JAG1,RBPJ,MYC,ADAM12,NCOR2,MAML2
11_Member	GO Biological Processes	GO:0007219	Notch signaling pathway	-3.28741	-0.965505	10/193	182,1004,1387,1956,3516,4609,6092,23090,81619,84441	JAG1,CDH6,CREBBP,EGFR,RBPJ,MYC,ROBO2,ZNF423,TSPAN14,MAML2
11_Member	Canonical Pathways	M288	PID HES HEY PATHWAY	-3.20676	-0.910409	5/48	1387,3091,3516,9612,84441	CREBBP,HIF1A,RBPJ,NCOR2,MAML2
11_Member	KEGG Pathway	hsa04330	Notch signaling pathway	-3.20676	-0.910409	5/48	182,1387,3516,9612,84441	JAG1,CREBBP,RBPJ,NCOR2,MAML2
11_Member	Reactome Gene Sets	R-HSA-350054	Notch-HLH transcription pathway	-3.18072	-0.904479	4/28	1387,3516,9612,84441	CREBBP,RBPJ,NCOR2,MAML2
11_Member	Reactome Gene Sets	R-HSA-9012852	Signaling by NOTCH3	-3.16512	-0.904479	5/49	182,1387,1956,3516,84441	JAG1,CREBBP,EGFR,RBPJ,MAML2
11_Member	GO Biological Processes	GO:0008593	regulation of Notch signaling pathway	-3.08338	-0.862751	7/105	182,1387,1956,3516,6092,81619,84441	JAG1,CREBBP,EGFR,RBPJ,ROBO2,TSPAN14,MAML2
11_Member	Reactome Gene Sets	R-HSA-210744	Regulation of gene expression in late stage (branching morphogenesis) pancreatic bud precursor cells	-2.84035	-0.71871	3/16	1387,3516,84441	CREBBP,RBPJ,MAML2
11_Member	GO Biological Processes	GO:0007221	positive regulation of transcription of Notch receptor target	-2.68612	-0.653214	3/18	1387,3516,84441	CREBBP,RBPJ,MAML2
11_Member	Reactome Gene Sets	R-HSA-8864260	Transcriptional regulation by the AP-2 (TFAP2) family of transcription factors	-2.67291	-0.645738	4/38	1081,1387,1956,4609	CGA,CREBBP,EGFR,MYC
11_Member	Reactome Gene Sets	R-HSA-9013695	NOTCH4 Intracellular Domain Regulates Transcription	-2.55015	-0.588211	3/20	1387,3516,84441	CREBBP,RBPJ,MAML2
11_Member	Canonical Pathways	M70	PID PS1 PATHWAY	-2.36748	-0.48702	4/46	1387,2353,3516,4609	CREBBP,FOS,RBPJ,MYC
11_Member	Reactome Gene Sets	R-HSA-5663202	Diseases of signal transduction	-2.34817	-0.476229	13/389	182,1387,1956,2263,2335,3516,4609,7855,8325,9612,79109,84441,153090	JAG1,CREBBP,EGFR,FGFR2,FN1,RBPJ,MYC,FZD5,FZD8,NCOR2,MAPKAP1,MAML2,DAB2IP
11_Member	Reactome Gene Sets	R-HSA-9013508	NOTCH3 Intracellular Domain Regulates Transcription	-2.26841	-0.453292	3/25	1387,3516,84441	CREBBP,RBPJ,MAML2
11_Member	Reactome Gene Sets	R-HSA-9013694	Signaling by NOTCH4	-2.1767	-0.397942	5/82	182,1387,3516,7534,84441	JAG1,CREBBP,RBPJ,YWHAZ,MAML2
11_Member	Reactome Gene Sets	R-HSA-157118	Signaling by NOTCH	-2.1369	-0.364662	9/235	182,1387,1956,3091,3516,4609,7534,9612,84441	JAG1,CREBBP,EGFR,HIF1A,RBPJ,MYC,YWHAZ,NCOR2,MAML2
12_Summary	GO Biological Processes	GO:0040008	regulation of growth	-4.22442	-1.46989	24/682	1630,1956,2185,2263,2335,2487,2719,3091,3516,3720,5629,6446,8091,8651,10743,23251,51083,51196,55636,60676,79602,114804,153090,440093	DCC,EGFR,PTK2B,FGFR2,FN1,FRZB,GPC3,HIF1A,RBPJ,JARID2,PROX1,SGK1,HMGA2,SOCS1,RAI1,MINAR1,GAL,PLCE1,CHD7,PAPPA2,ADIPOR2,RNF157,DAB2IP,H3-5
12_Member	GO Biological Processes	GO:0040008	regulation of growth	-4.22442	-1.46989	24/682	1630,1956,2185,2263,2335,2487,2719,3091,3516,3720,5629,6446,8091,8651,10743,23251,51083,51196,55636,60676,79602,114804,153090,440093	DCC,EGFR,PTK2B,FGFR2,FN1,FRZB,GPC3,HIF1A,RBPJ,JARID2,PROX1,SGK1,HMGA2,SOCS1,RAI1,MINAR1,GAL,PLCE1,CHD7,PAPPA2,ADIPOR2,RNF157,DAB2IP,H3-5
12_Member	GO Biological Processes	GO:0001558	regulation of cell growth	-2.0875	-0.33407	13/419	1630,1956,2185,2335,2487,6446,23251,51083,51196,60676,79602,114804,440093	DCC,EGFR,PTK2B,FN1,FRZB,SGK1,MINAR1,GAL,PLCE1,PAPPA2,ADIPOR2,RNF157,H3-5
13_Summary	GO Biological Processes	GO:0048820	hair follicle maturation	-4.17262	-1.44615	4/16	3516,26133,51083,55612,1956,2263,9620,2185,3091,56975,64131,84530,7534,7855,153090,5583,6431,9555,182,80144,168002	RBPJ,TRPC4AP,GAL,FERMT1,EGFR,FGFR2,CELSR1,PTK2B,HIF1A,FAM20C,XYLT1,SRRM4,YWHAZ,FZD5,DAB2IP,PRKCH,SRSF6,MACROH2A1,JAG1,FRAS1,DACT2
13_Member	GO Biological Processes	GO:0048820	hair follicle maturation	-4.17262	-1.44615	4/16	3516,26133,51083,55612	RBPJ,TRPC4AP,GAL,FERMT1
13_Member	GO Biological Processes	GO:0001942	hair follicle development	-3.60941	-1.17268	7/86	1956,2263,3516,9620,26133,51083,55612	EGFR,FGFR2,RBPJ,CELSR1,TRPC4AP,GAL,FERMT1
13_Member	GO Biological Processes	GO:0022404	molting cycle process	-3.54762	-1.1439	7/88	1956,2263,3516,9620,26133,51083,55612	EGFR,FGFR2,RBPJ,CELSR1,TRPC4AP,GAL,FERMT1
13_Member	GO Biological Processes	GO:0022405	hair cycle process	-3.54762	-1.1439	7/88	1956,2263,3516,9620,26133,51083,55612	EGFR,FGFR2,RBPJ,CELSR1,TRPC4AP,GAL,FERMT1
13_Member	GO Biological Processes	GO:0098773	skin epidermis development	-3.54762	-1.1439	7/88	1956,2263,3516,9620,26133,51083,55612	EGFR,FGFR2,RBPJ,CELSR1,TRPC4AP,GAL,FERMT1
13_Member	GO Biological Processes	GO:0071695	anatomical structure maturation	-3.17067	-0.904479	9/165	2185,3091,3516,26133,51083,55612,56975,64131,84530	PTK2B,HIF1A,RBPJ,TRPC4AP,GAL,FERMT1,FAM20C,XYLT1,SRRM4
13_Member	GO Biological Processes	GO:0021700	developmental maturation	-3.03831	-0.831363	12/284	2185,3091,3516,7534,7855,26133,51083,55612,56975,64131,84530,153090	PTK2B,HIF1A,RBPJ,YWHAZ,FZD5,TRPC4AP,GAL,FERMT1,FAM20C,XYLT1,SRRM4,DAB2IP
13_Member	GO Biological Processes	GO:0042303	molting cycle	-2.9186	-0.777154	7/112	1956,2263,3516,9620,26133,51083,55612	EGFR,FGFR2,RBPJ,CELSR1,TRPC4AP,GAL,FERMT1
13_Member	GO Biological Processes	GO:0042633	hair cycle	-2.9186	-0.777154	7/112	1956,2263,3516,9620,26133,51083,55612	EGFR,FGFR2,RBPJ,CELSR1,TRPC4AP,GAL,FERMT1
13_Member	GO Biological Processes	GO:0045682	regulation of epidermis development	-2.11183	-0.345743	5/85	5583,6431,9555,51083,55612	PRKCH,SRSF6,MACROH2A1,GAL,FERMT1
13_Member	GO Biological Processes	GO:0043588	skin development	-2.0875	-0.33407	13/419	182,1956,2263,3516,5583,6431,9555,9620,26133,51083,55612,80144,168002	JAG1,EGFR,FGFR2,RBPJ,PRKCH,SRSF6,MACROH2A1,CELSR1,TRPC4AP,GAL,FERMT1,FRAS1,DACT2
14_Summary	GO Biological Processes	GO:0001501	skeletal system development	-4.14681	-1.44206	20/518	2263,2487,3091,4147,6664,7704,8091,10743,25976,27086,55636,55790,56243,56975,59338,60676,64131,80263,91461,130497,182,2185,3399,3516,1956,2719,23376,256764	FGFR2,FRZB,HIF1A,MATN2,SOX11,ZBTB16,HMGA2,RAI1,TIPARP,FOXP1,CHD7,CSGALNACT1,KIAA1217,FAM20C,PLEKHA1,PAPPA2,XYLT1,TRIM45,PKDCC,OSR1,JAG1,PTK2B,ID3,RBPJ,EGFR,GPC3,UFL1,WDR72
14_Member	GO Biological Processes	GO:0001501	skeletal system development	-4.14681	-1.44206	20/518	2263,2487,3091,4147,6664,7704,8091,10743,25976,27086,55636,55790,56243,56975,59338,60676,64131,80263,91461,130497	FGFR2,FRZB,HIF1A,MATN2,SOX11,ZBTB16,HMGA2,RAI1,TIPARP,FOXP1,CHD7,CSGALNACT1,KIAA1217,FAM20C,PLEKHA1,PAPPA2,XYLT1,TRIM45,PKDCC,OSR1
14_Member	GO Biological Processes	GO:0030278	regulation of ossification	-3.72963	-1.23347	11/203	182,2185,2263,3091,3399,3516,6664,7704,56975,91461,130497	JAG1,PTK2B,FGFR2,HIF1A,ID3,RBPJ,SOX11,ZBTB16,FAM20C,PKDCC,OSR1
14_Member	GO Biological Processes	GO:0001503	ossification	-3.61038	-1.17268	16/399	182,1956,2185,2263,2719,3091,3399,3516,6664,7704,23376,55790,56975,64131,91461,130497	JAG1,EGFR,PTK2B,FGFR2,GPC3,HIF1A,ID3,RBPJ,SOX11,ZBTB16,UFL1,CSGALNACT1,FAM20C,XYLT1,PKDCC,OSR1
14_Member	GO Biological Processes	GO:0030282	bone mineralization	-2.87389	-0.743874	7/114	2185,2263,2719,3091,56975,91461,130497	PTK2B,FGFR2,GPC3,HIF1A,FAM20C,PKDCC,OSR1
14_Member	GO Biological Processes	GO:0045778	positive regulation of ossification	-2.71402	-0.661296	6/90	182,6664,7704,56975,91461,130497	JAG1,SOX11,ZBTB16,FAM20C,PKDCC,OSR1
14_Member	GO Biological Processes	GO:0031214	biomineral tissue development	-2.5885	-0.597295	8/163	2185,2263,2719,3091,56975,91461,130497,256764	PTK2B,FGFR2,GPC3,HIF1A,FAM20C,PKDCC,OSR1,WDR72
14_Member	GO Biological Processes	GO:0030500	regulation of bone mineralization	-2.31581	-0.469743	5/76	2185,3091,56975,91461,130497	PTK2B,HIF1A,FAM20C,PKDCC,OSR1
15_Summary	GO Biological Processes	GO:0033564	anterior/posterior axon guidance	-4.00261	-1.34782	3/7	1630,8633,219699,9844	DCC,UNC5C,UNC5B,ELMO1
15_Member	GO Biological Processes	GO:0033564	anterior/posterior axon guidance	-4.00261	-1.34782	3/7	1630,8633,219699	DCC,UNC5C,UNC5B
15_Member	Reactome Gene Sets	R-HSA-418886	Netrin mediated repulsion signals	-3.80315	-1.24149	3/8	1630,8633,219699	DCC,UNC5C,UNC5B
15_Member	GO Biological Processes	GO:0038007	netrin-activated signaling pathway	-3.11825	-0.887067	3/13	1630,8633,219699	DCC,UNC5C,UNC5B
15_Member	Canonical Pathways	M108	PID NETRIN PATHWAY	-2.95579	-0.787471	4/32	1630,8633,9844,219699	DCC,UNC5C,ELMO1,UNC5B
16_Summary	GO Biological Processes	GO:0060070	canonical Wnt signaling pathway	-3.93392	-1.29762	15/335	1500,1501,1956,2263,2487,2535,2719,3516,7855,8325,25805,55612,65268,144165,153090,4919,9620,10159,168002,182,4609,6092,6431,2185,1741,284217	CTNND1,CTNND2,EGFR,FGFR2,FRZB,FZD2,GPC3,RBPJ,FZD5,FZD8,BAMBI,FERMT1,WNK2,PRICKLE1,DAB2IP,ROR1,CELSR1,ATP6AP2,DACT2,JAG1,MYC,ROBO2,SRSF6,PTK2B,DLG3,LAMA1
16_Member	GO Biological Processes	GO:0060070	canonical Wnt signaling pathway	-3.93392	-1.29762	15/335	1500,1501,1956,2263,2487,2535,2719,3516,7855,8325,25805,55612,65268,144165,153090	CTNND1,CTNND2,EGFR,FGFR2,FRZB,FZD2,GPC3,RBPJ,FZD5,FZD8,BAMBI,FERMT1,WNK2,PRICKLE1,DAB2IP
16_Member	GO Biological Processes	GO:0016055	Wnt signaling pathway	-3.64034	-1.18612	19/522	1500,1501,1956,2263,2487,2535,2719,3516,4919,7855,8325,9620,10159,25805,55612,65268,144165,153090,168002	CTNND1,CTNND2,EGFR,FGFR2,FRZB,FZD2,GPC3,RBPJ,ROR1,FZD5,FZD8,CELSR1,ATP6AP2,BAMBI,FERMT1,WNK2,PRICKLE1,DAB2IP,DACT2
16_Member	GO Biological Processes	GO:0198738	cell-cell signaling by wnt	-3.6195	-1.17268	19/524	1500,1501,1956,2263,2487,2535,2719,3516,4919,7855,8325,9620,10159,25805,55612,65268,144165,153090,168002	CTNND1,CTNND2,EGFR,FGFR2,FRZB,FZD2,GPC3,RBPJ,ROR1,FZD5,FZD8,CELSR1,ATP6AP2,BAMBI,FERMT1,WNK2,PRICKLE1,DAB2IP,DACT2
16_Member	GO Biological Processes	GO:2000027	regulation of animal organ morphogenesis	-3.46657	-1.08854	12/254	182,2263,2535,2719,3516,4609,4919,6092,6431,7855,9620,144165	JAG1,FGFR2,FZD2,GPC3,RBPJ,MYC,ROR1,ROBO2,SRSF6,FZD5,CELSR1,PRICKLE1
16_Member	Reactome Gene Sets	R-HSA-5140745	WNT5A-dependent internalization of FZD2, FZD5 and ROR2	-3.11825	-0.887067	3/13	2535,4919,7855	FZD2,ROR1,FZD5
16_Member	GO Biological Processes	GO:1905114	cell surface receptor signaling pathway involved in cell-cell signaling	-3.09179	-0.867666	20/625	1500,1501,1956,2185,2263,2487,2535,2719,3516,4919,7855,8325,9620,10159,25805,55612,65268,144165,153090,168002	CTNND1,CTNND2,EGFR,PTK2B,FGFR2,FRZB,FZD2,GPC3,RBPJ,ROR1,FZD5,FZD8,CELSR1,ATP6AP2,BAMBI,FERMT1,WNK2,PRICKLE1,DAB2IP,DACT2
16_Member	GO Biological Processes	GO:0030111	regulation of Wnt signaling pathway	-3.02982	-0.826466	14/366	1500,1501,1956,2263,2487,2719,3516,10159,25805,55612,65268,144165,153090,168002	CTNND1,CTNND2,EGFR,FGFR2,FRZB,GPC3,RBPJ,ATP6AP2,BAMBI,FERMT1,WNK2,PRICKLE1,DAB2IP,DACT2
16_Member	GO Biological Processes	GO:0060828	regulation of canonical Wnt signaling pathway	-3.01206	-0.815181	12/286	1500,1501,1956,2263,2487,2719,3516,25805,55612,65268,144165,153090	CTNND1,CTNND2,EGFR,FGFR2,FRZB,GPC3,RBPJ,BAMBI,FERMT1,WNK2,PRICKLE1,DAB2IP
16_Member	GO Biological Processes	GO:0001738	morphogenesis of a polarized epithelium	-2.94708	-0.784875	8/143	1741,2535,2719,4919,7855,9620,144165,284217	DLG3,FZD2,GPC3,ROR1,FZD5,CELSR1,PRICKLE1,LAMA1
16_Member	GO Biological Processes	GO:0035567	non-canonical Wnt signaling pathway	-2.81443	-0.703717	8/150	2487,2535,2719,4919,7855,8325,9620,144165	FRZB,FZD2,GPC3,ROR1,FZD5,FZD8,CELSR1,PRICKLE1
16_Member	GO Biological Processes	GO:0001736	establishment of planar polarity	-2.66443	-0.645738	7/124	1741,2535,2719,4919,7855,9620,144165	DLG3,FZD2,GPC3,ROR1,FZD5,CELSR1,PRICKLE1
16_Member	GO Biological Processes	GO:0007164	establishment of tissue polarity	-2.66443	-0.645738	7/124	1741,2535,2719,4919,7855,9620,144165	DLG3,FZD2,GPC3,ROR1,FZD5,CELSR1,PRICKLE1
16_Member	GO Biological Processes	GO:0060071	Wnt signaling pathway, planar cell polarity pathway	-2.31964	-0.469743	6/108	2535,2719,4919,7855,9620,144165	FZD2,GPC3,ROR1,FZD5,CELSR1,PRICKLE1
16_Member	GO Biological Processes	GO:0090175	regulation of establishment of planar polarity	-2.28103	-0.453443	6/110	2535,2719,4919,7855,9620,144165	FZD2,GPC3,ROR1,FZD5,CELSR1,PRICKLE1
17_Summary	GO Biological Processes	GO:0048745	smooth muscle tissue development	-3.76719	-1.23347	4/20	4638,5629,25976,130497	MYLK,PROX1,TIPARP,OSR1
17_Member	GO Biological Processes	GO:0048745	smooth muscle tissue development	-3.76719	-1.23347	4/20	4638,5629,25976,130497	MYLK,PROX1,TIPARP,OSR1
18_Summary	KEGG Pathway	hsa05205	Proteoglycans in cancer	-3.72963	-1.23347	11/203	288,1956,2335,2535,2719,3091,3708,4609,7855,8325,51196,1496,1741,7534,10971,286204,10159,1387,1441,1630,2263,2353,7704,284217,1852,3399,3720,25805,144165,182,6446,51606,79109,220441,2487	ANK3,EGFR,FN1,FZD2,GPC3,HIF1A,ITPR1,MYC,FZD5,FZD8,PLCE1,CTNNA2,DLG3,YWHAZ,YWHAQ,CRB2,ATP6AP2,CREBBP,CSF3R,DCC,FGFR2,FOS,ZBTB16,LAMA1,DUSP9,ID3,JARID2,BAMBI,PRICKLE1,JAG1,SGK1,ATP6V1H,MAPKAP1,RNF152,FRZB
18_Member	KEGG Pathway	hsa05205	Proteoglycans in cancer	-3.72963	-1.23347	11/203	288,1956,2335,2535,2719,3091,3708,4609,7855,8325,51196	ANK3,EGFR,FN1,FZD2,GPC3,HIF1A,ITPR1,MYC,FZD5,FZD8,PLCE1
18_Member	KEGG Pathway	hsa04390	Hippo signaling pathway	-3.38766	-1.04325	9/154	1496,1741,2535,4609,7534,7855,8325,10971,286204	CTNNA2,DLG3,FZD2,MYC,YWHAZ,FZD5,FZD8,YWHAQ,CRB2
18_Member	Canonical Pathways	M77	PID WNT SIGNALING PATHWAY	-3.18072	-0.904479	4/28	2535,7855,8325,10159	FZD2,FZD5,FZD8,ATP6AP2
18_Member	KEGG Pathway	hsa05200	Pathways in cancer	-3.17501	-0.904479	15/395	1387,1441,1496,1630,1956,2263,2335,2353,2535,3091,4609,7704,7855,8325,284217	CREBBP,CSF3R,CTNNA2,DCC,EGFR,FGFR2,FN1,FOS,FZD2,HIF1A,MYC,ZBTB16,FZD5,FZD8,LAMA1
18_Member	KEGG Pathway	hsa04550	Signaling pathways regulating pluripotency of stem cells	-3.02674	-0.826466	8/139	1852,2263,2535,3399,3720,4609,7855,8325	DUSP9,FGFR2,FZD2,ID3,JARID2,MYC,FZD5,FZD8
18_Member	KEGG Pathway	hsa04310	Wnt signaling pathway	-2.32099	-0.469743	7/143	1387,2535,4609,7855,8325,25805,144165	CREBBP,FZD2,MYC,FZD5,FZD8,BAMBI,PRICKLE1
18_Member	KEGG Pathway	hsa05224	Breast cancer	-2.30461	-0.465049	7/144	182,1956,2353,2535,4609,7855,8325	JAG1,EGFR,FOS,FZD2,MYC,FZD5,FZD8
18_Member	KEGG Pathway	hsa04150	mTOR signaling pathway	-2.19402	-0.406683	7/151	2535,6446,7855,8325,51606,79109,220441	FZD2,SGK1,FZD5,FZD8,ATP6V1H,MAPKAP1,RNF152
18_Member	Canonical Pathways	M5493	WNT SIGNALING	-2.0297	-0.298746	5/89	2487,2535,4609,7855,8325	FRZB,FZD2,MYC,FZD5,FZD8
19_Summary	GO Biological Processes	GO:0006970	response to osmotic stress	-3.67296	-1.20667	7/84	1956,2185,3176,3778,4638,10367,60676	EGFR,PTK2B,HNMT,KCNMA1,MYLK,MICU1,PAPPA2
19_Member	GO Biological Processes	GO:0006970	response to osmotic stress	-3.67296	-1.20667	7/84	1956,2185,3176,3778,4638,10367,60676	EGFR,PTK2B,HNMT,KCNMA1,MYLK,MICU1,PAPPA2
20_Summary	GO Biological Processes	GO:0032409	regulation of transporter activity	-3.59074	-1.15969	13/283	288,306,1741,2185,6347,6446,7402,51083,54602,57120,57190,65268,130497,1081,8440,79643,130576,2719,3778,10971,55636,79602	ANK3,ANXA3,DLG3,PTK2B,CCL2,SGK1,UTRN,GAL,NDFIP2,GOPC,SELENON,WNK2,OSR1,CGA,NCK2,CHMP6,LYPD6B,GPC3,KCNMA1,YWHAQ,CHD7,ADIPOR2
20_Member	GO Biological Processes	GO:0032409	regulation of transporter activity	-3.59074	-1.15969	13/283	288,306,1741,2185,6347,6446,7402,51083,54602,57120,57190,65268,130497	ANK3,ANXA3,DLG3,PTK2B,CCL2,SGK1,UTRN,GAL,NDFIP2,GOPC,SELENON,WNK2,OSR1
20_Member	GO Biological Processes	GO:0032412	regulation of ion transmembrane transporter activity	-2.83428	-0.715394	11/260	288,306,1741,2185,6347,7402,51083,57120,57190,65268,130497	ANK3,ANXA3,DLG3,PTK2B,CCL2,UTRN,GAL,GOPC,SELENON,WNK2,OSR1
20_Member	GO Biological Processes	GO:2000310	regulation of NMDA receptor activity	-2.7611	-0.684362	4/36	306,1741,2185,6347	ANXA3,DLG3,PTK2B,CCL2
20_Member	GO Biological Processes	GO:0022898	regulation of transmembrane transporter activity	-2.73054	-0.668456	11/268	288,306,1741,2185,6347,7402,51083,57120,57190,65268,130497	ANK3,ANXA3,DLG3,PTK2B,CCL2,UTRN,GAL,GOPC,SELENON,WNK2,OSR1
20_Member	GO Biological Processes	GO:0010469	regulation of signaling receptor activity	-2.43055	-0.521171	8/173	306,1081,1741,2185,6347,8440,79643,130576	ANXA3,CGA,DLG3,PTK2B,CCL2,NCK2,CHMP6,LYPD6B
20_Member	GO Biological Processes	GO:0099601	regulation of neurotransmitter receptor activity	-2.36523	-0.48702	5/74	306,1741,2185,6347,130576	ANXA3,DLG3,PTK2B,CCL2,LYPD6B
20_Member	GO Biological Processes	GO:2000649	regulation of sodium ion transmembrane transporter activity	-2.17686	-0.397942	4/52	288,7402,65268,130497	ANK3,UTRN,WNK2,OSR1
20_Member	GO Biological Processes	GO:0034762	regulation of transmembrane transport	-2.06023	-0.319029	16/568	288,306,1741,2185,2719,3778,6347,7402,10971,51083,55636,57120,57190,65268,79602,130497	ANK3,ANXA3,DLG3,PTK2B,GPC3,KCNMA1,CCL2,UTRN,YWHAQ,GAL,CHD7,GOPC,SELENON,WNK2,ADIPOR2,OSR1
