# Supplementary material for: Pancreatic progenitor epigenome maps prioritize type 2 diabetes risk genes with roles in development
Source: eLife. 2021 Feb 5;10:e59067. doi: 10.7554/eLife.59067 (PMC7864636; doi:10.7554/eLife.59067)
Supplement: Figure 2—source data 3. [file elife-59067-fig2-data3.xlsx]

## Sheet: Sheet1
Figure 2 – source data 3: Proportion of variants nominally associated with beta cell functional traits.
Trait	PSSE + ATAC		Islet SE + ATAC		Genome-wide
	Prop with nominal assoc.	χ2 test P-value	Prop with nominal assoc.	χ2 test P-value	Prop with nominal assoc.
Fasting glucose	0.0703422	0.311793	0.0811235	1.27481e-11	0.0599805
Acute insulin response	0.0517774	0.84966	0.054667	0.0187144	0.05093
Disposition index	0.0494208	0.849757	0.0553386	0.00679208	0.0510244
Insulin secretion rate	0.0446521	0.652153	0.0506366	0.199915	0.0482913
Peak insulin response	0.0486111	0.800039	0.055567	0.00263031	0.0507765
HOMA-B	0.0571992	0.769077	0.0646241	0.000936963	0.0546058
2hr glucose adj. BMI	0.0530612	0.919423	0.0659011	1.54198e-05	0.0526453
Fasting proinsulin	0.044316	0.549972	0.0631545	4.73342e-05	0.0512603
