# Supplementary material for: Pancreatic progenitor epigenome maps prioritize type 2 diabetes risk genes with roles in development
Source: eLife. 2021 Feb 5;10:e59067. doi: 10.7554/eLife.59067 (PMC7864636; doi:10.7554/eLife.59067)
Supplement: Figure 2—source data 4. [file elife-59067-fig2-data4.xlsx]

## Sheet: Sheet1
Figure 2 – source data 4: Tissue identity of downloaded data from ROADMAP consortium.
E003	H1 Cells
E004	H1 BMP4 Derived Mesendoderm Cultured Cells
E005	H1 BMP4 Derived Trophoblast Cultured Cells
E006	H1 Derived Mesenchymal Stem Cells
E007	H1 Derived Neuronal Progenitor Cultured Cells
E008	H9 Cells
E011	hESC Derived CD184+ Endoderm Cultured Cells
E012	hESC Derived CD56+ Ectoderm Cultured Cells
E013	hESC Derived CD56+ Mesoderm Cultured Cells
E014	HUES48 Cells
E015	HUES6 Cells
E016	HUES64 Cells
E017	IMR90 fetal lung fibroblasts Cell Line
E019	iPS-18 Cells
E020	iPS-20b Cells
E021	iPS DF 6.9 Cells
E022	iPS DF 19.11 Cells
E026	Bone Marrow Derived Cultured Mesenchymal Stem Cells
E029	Primary monocytes fromÂ peripheralÂ blood
E032	Primary B cells from peripheral blood
E034	Primary T cells fromÂ peripheralÂ blood
E037	Primary T helper memory cells from peripheral blood 2
E038	Primary T helper naive cells from peripheral blood
E039	Primary T helper naive cells fromÂ peripheralÂ blood
E040	Primary T helper memory cells from peripheral blood 1
E041	Primary T helper cells PMA-I stimulated
E043	Primary T helper cells fromÂ peripheralÂ blood
E044	Primary T regulatory cells fromÂ peripheralÂ blood
E045	Primary T cells effector/memory enriched from peripheral blood
E046	Primary Natural Killer cells fromÂ peripheralÂ blood
E047	Primary T CD8+ naive cells from peripheral blood
E048	Primary T CD8+ memory cells from peripheral blood
E049	Mesenchymal Stem Cell Derived Chondrocyte Cultured Cells
E050	Primary hematopoietic stem cells G-CSF-mobilized Female
E055	Foreskin Fibroblast Primary Cells skin01
E056	Foreskin Fibroblast Primary Cells skin02
E058	Foreskin Keratinocyte Primary Cells skin03
E059	Foreskin Melanocyte Primary Cells skin01
E061	Foreskin Melanocyte Primary Cells skin03
E062	Primary mononuclear cells fromÂ peripheralÂ blood
E063	Adipose Nuclei
E065	Aorta
E066	Liver
E067	Brain Angular Gyrus
E068	Brain Anterior Caudate
E069	Brain Cingulate Gyrus
E071	Brain Hippocampus Middle
E072	Brain Inferior Temporal Lobe
E073	Brain_Dorsolateral_Prefrontal_Cortex
E074	Brain Substantia Nigra
E075	Colonic Mucosa
E076	Colon Smooth Muscle
E078	Duodenum Smooth Muscle
E079	Esophagus
E080	Fetal Adrenal Gland
E084	Fetal Intestine Large
E085	Fetal Intestine Small
E087	Pancreatic Islets
E089	Fetal Muscle Trunk
E090	Fetal Muscle Leg
E091	Placenta
E092	Fetal Stomach
E093	Fetal Thymus
E094	Gastric
E095	Left Ventricle
E096	Lung
E097	Ovary
E098	Pancreas
E099	Placenta Amnion
E100	Psoas Muscle
E101	Rectal Mucosa Donor 29
E102	Rectal Mucosa Donor 31
E103	Rectal Smooth Muscle
E104	Right Atrium
E105	Right Ventricle
E106	Sigmoid Colon
E108	Skeletal Muscle Female
E109	Small Intestine
E111	Stomach Smooth Muscle
E112	Thymus
E113	Spleen
E114	A549 EtOH 0.02pct Lung Carcinoma Cell Line
E115	Dnd41 TCell Leukemia Cell Line
E116	GM12878 Lymphoblastoid Cells
E117	HeLa-S3 Cervical Carcinoma Cell Line
E118	HepG2 Hepatocellular Carcinoma Cell Line
E119	HMEC Mammary Epithelial Primary Cells
E120	HSMM Skeletal Muscle Myoblasts Cells
E121	HSMM cell derived Skeletal Muscle Myotubes Cells
E122	HUVEC Umbilical Vein Endothelial Primary Cells
E123	K562 Leukemia Cells
E124	Monocytes-CD14+ RO01746 Primary Cells
E125	NH-A Astrocytes Primary Cells
E126	NHDF-Ad Adult Dermal Fibroblast Primary Cells
E127	NHEK-Epidermal Keratinocyte Primary Cells
E128	NHLF Lung Fibroblast Primary Cells
E129	Osteoblast Primary Cells
