# Supplementary material for: Pancreatic progenitor epigenome maps prioritize type 2 diabetes risk genes with roles in development
Source: eLife. 2021 Feb 5;10:e59067. doi: 10.7554/eLife.59067 (PMC7864636; doi:10.7554/eLife.59067)
Supplement: Figure 4—source data 1. [file elife-59067-fig4-data1.xlsx]

## Sheet: 1
Figure 4 – source data 1: Genes downregulated in ∆LAMA1Enh PP2 stage cells compared to control cells (p adj. < .05).
chr	start	end	Gene ID	Log2-fold Change	p-value	adj. p-value
chr1	84964008	84972248	GNG5|GNG5-002|ENSG00000174021.6|ENST00000370645.4|protein_coding	-0.369849	0.00104601	0.0409064
chr3	150126122	150184218	TSC22D2|TSC22D2-001|ENSG00000196428.8|ENST00000361875.3|protein_coding	-0.460542	0.000755276	0.0321849
chr20	21491648	21494664	NKX2-2|NKX2-2-001|ENSG00000125820.5|ENST00000377142.4|protein_coding	-0.554768	2.87121e-05	0.00306442
chr14	23790839	23791484	AL049829.1|AL049829.1-201|ENSG00000268702.1|ENST00000594872.1|protein_coding	-0.591457	0.00099863	0.0398648
chr16	4658884	4661524	UBALD1|UBALD1-005|ENSG00000153443.8|ENST00000590891.1|protein_coding	-0.543478	0.000166575	0.0111309
chr9	139738867	139741797	C9orf172|C9orf172-201|ENSG00000232434.1|ENST00000436881.1|protein_coding	-0.806379	4.56737e-05	0.00430202
chr12	120779133	120806983	MSI1|MSI1-001|ENSG00000135097.2|ENST00000257552.2|protein_coding	-0.792591	2.11934e-10	1.48055e-07
chr19	4044362	4066943	ZBTB7A|ZBTB7A-001|ENSG00000178951.4|ENST00000322357.4|protein_coding	-0.979567	1.78743e-07	4.99473e-05
chr19	14202500	14228556	PRKACA|PRKACA-001|ENSG00000072062.9|ENST00000308677.4|protein_coding	-0.392189	0.000988127	0.0395991
chr19	7581004	7585912	ZNF358|ZNF358-001|ENSG00000198816.5|ENST00000597229.1|protein_coding	-0.43424	0.000806334	0.0337082
chr2	69240310	69476459	ANTXR1|ANTXR1-001|ENSG00000169604.15|ENST00000303714.4|protein_coding	-0.516527	0.000211411	0.0131015
chr4	1984441	2011837	NELFA|NELFA-001|ENSG00000185049.8|ENST00000382882.3|protein_coding	-0.408924	0.000961828	0.0389009
chr19	1228286	1238026	C19orf26|C19orf26-001|ENSG00000099625.8|ENST00000590083.1|protein_coding	-0.721107	0.000288591	0.0166791
chr16	2563871	2570219	ATP6V0C|ATP6V0C-001|ENSG00000185883.6|ENST00000330398.4|protein_coding	-0.747403	8.80775e-06	0.00121952
chr20	33104219	33128762	DYNLRB1|DYNLRB1-001|ENSG00000125971.12|ENST00000480759.1|protein_coding	-0.541034	2.8639e-05	0.00306442
chr16	2546033	2570219	RP11-20I23.1|RP11-20I23.1-001|ENSG00000260272.1|ENST00000564543.1|protein_coding	-0.709558	2.55576e-05	0.00286711
chr6	31637944	31641323	LY6G5B|LY6G5B-001|ENSG00000240053.8|ENST00000375864.4|protein_coding	-0.708156	0.000355159	0.0188956
chrM	648	1601	MT-RNR1|MT-RNR1-201|ENSG00000211459.2|ENST00000389680.2|Mt_rRNA	-0.790995	6.87706e-10	4.22774e-07
chr3	185361527	185542844	IGF2BP2|IGF2BP2-001|ENSG00000073792.11|ENST00000382199.2|protein_coding	-0.34527	0.000552432	0.025976
chr20	30780306	30795594	PLAGL2|PLAGL2-001|ENSG00000126003.6|ENST00000246229.4|protein_coding	-0.433959	5.95425e-05	0.00528964
chr16	87636511	87731762	JPH3|JPH3-001|ENSG00000154118.8|ENST00000284262.2|protein_coding	-0.551122	0.0013917	0.0475313
chr19	926000	975939	ARID3A|ARID3A-001|ENSG00000116017.6|ENST00000263620.3|protein_coding	-0.413055	4.4141e-05	0.00424002
chr3	152880029	152886265	RAP2B|RAP2B-001|ENSG00000181467.2|ENST00000323534.2|protein_coding	-0.634375	1.06957e-06	0.000228309
chr5	118173017	118323915	DTWD2|DTWD2-004|ENSG00000169570.5|ENST00000304058.4|protein_coding	-0.55539	0.000755985	0.0321849
chr19	21265006	21305954	ZNF714|ZNF714-001|ENSG00000160352.11|ENST00000596143.1|protein_coding	-0.567501	0.000156739	0.0107386
chr11	65265233	65273940	MALAT1|MALAT1-001|ENSG00000251562.3|ENST00000534336.1|lincRNA	-2.70248	4.17127e-44	3.20541e-40
chr16	67562784	67580689	FAM65A|FAM65A-003|ENSG00000039523.13|ENST00000540839.3|protein_coding	-0.465645	8.83444e-05	0.00710872
chr20	30102231	30157370	HM13|HM13-009|ENSG00000101294.12|ENST00000335574.5|protein_coding	-0.445509	0.0012023	0.0432803
chr1	245014468	245027844	HNRNPU|HNRNPU-001|ENSG00000153187.12|ENST00000444376.2|protein_coding	-0.339868	0.000128432	0.00922369
chrM	3307	4262	MT-ND1|MT-ND1-201|ENSG00000198888.2|ENST00000361390.2|protein_coding	-0.599302	1.99228e-06	0.000373406
chr11	47352957	47374253	MYBPC3|MYBPC3-201|ENSG00000134571.6|ENST00000256993.4|protein_coding	-0.702627	0.000225996	0.013783
chr14	99947746	99978777	CCNK|CCNK-001|ENSG00000090061.13|ENST00000389879.5|protein_coding	-0.564612	8.22914e-07	0.000180677
chr4	778745	819986	CPLX1|CPLX1-001|ENSG00000168993.10|ENST00000304062.6|protein_coding	-0.871994	7.47748e-06	0.00106419
chr18	9136775	9285983	ANKRD12|ANKRD12-001|ENSG00000101745.11|ENST00000262126.4|protein_coding	-0.557906	0.000343766	0.018538
chr9	139693675	139704487	RP11-216L13.19|RP11-216L13.19-001|ENSG00000273066.1|ENST00000415992.1|processed_transcript	-0.617635	0.000192104	0.0123018
chr5	140514800	140517703	PCDHB5|PCDHB5-001|ENSG00000113209.6|ENST00000231134.5|protein_coding	-2.95929	8.50272e-44	4.35594e-40
chr17	47074774	47133012	IGF2BP1|IGF2BP1-001|ENSG00000159217.5|ENST00000290341.3|protein_coding	-0.372324	0.00070465	0.030597
chr19	709101	748329	PALM|PALM-001|ENSG00000099864.13|ENST00000338448.5|protein_coding	-0.526949	3.41047e-05	0.00349437
chr6	123100620	123105219	FABP7|FABP7-001|ENSG00000164434.7|ENST00000368444.3|protein_coding	-0.448655	0.000827889	0.03404
chr20	306239	310865	SOX12|SOX12-001|ENSG00000177732.6|ENST00000342665.2|protein_coding	-0.660379	2.76882e-05	0.00301801
chr19	18794488	18893004	CRTC1|CRTC1-001|ENSG00000105662.11|ENST00000338797.6|protein_coding	-0.477177	0.00119572	0.0432803
chr19	2997636	3029165	TLE2|TLE2-004|ENSG00000065717.10|ENST00000262953.6|protein_coding	-0.466715	0.00131188	0.0458235
chr1	990413	991496	RP11-54O7.14|RP11-54O7.14-001|ENSG00000242590.1|ENST00000418300.1|sense_intronic	-0.785713	1.15216e-05	0.00146773
chr19	19976714	20005483	ZNF253|ZNF253-001|ENSG00000256771.2|ENST00000589717.1|protein_coding	-0.4506	0.000646576	0.0286376
chr19	12841454	12845589	C19orf43|C19orf43-001|ENSG00000123144.6|ENST00000242784.4|protein_coding	-0.609218	1.18644e-06	0.000249787
chr17	80693451	80709073	FN3K|FN3K-001|ENSG00000167363.9|ENST00000300784.7|protein_coding	-0.642996	0.000258854	0.0153174
chr5	134262350	134263726	MTND4P12|MTND4P12-001|ENSG00000247627.2|ENST00000498999.2|pseudogene	-1.00812	4.81403e-06	0.00076275
chr19	39220827	39226050	CAPN12|CAPN12-005|ENSG00000182472.4|ENST00000594552.1|protein_coding	-0.694278	6.87632e-06	0.00101617
chr12	10851826	10875510	YBX3|YBX3-002|ENSG00000060138.8|ENST00000540447.1|protein_coding	-0.436994	0.00128884	0.0452242
chr9	140194083	140196703	NRARP|NRARP-001|ENSG00000198435.2|ENST00000356628.2|protein_coding	-0.630123	6.72354e-05	0.00574078
chr7	6682041	6694242	ZNF316|ZNF316-201|ENSG00000205903.2|ENST00000382252.1|pseudogene	-0.837701	2.63167e-09	1.22564e-06
chr8	26435359	26515694	DPYSL2|DPYSL2-001|ENSG00000092964.12|ENST00000311151.5|protein_coding	-0.590403	8.18161e-07	0.000180677
chrM	14149	14673	MT-ND6|MT-ND6-201|ENSG00000198695.2|ENST00000361681.2|protein_coding	-0.461429	0.000157911	0.0107386
chr19	5205519	5340814	PTPRS|PTPRS-201|ENSG00000105426.10|ENST00000262963.6|protein_coding	-0.448213	0.000640061	0.0284309
chr7	64451187	64467031	ERV3-1|ERV3-1-001|ENSG00000213462.4|ENST00000394323.2|protein_coding	-0.511077	0.000155831	0.0107386
chr3	71003844	71633140	FOXP1|FOXP1-001|ENSG00000114861.14|ENST00000318789.4|protein_coding	-0.561694	3.0991e-07	8.0729e-05
chr20	32951041	33099198	ITCH|ITCH-001|ENSG00000078747.8|ENST00000374864.4|protein_coding	-0.393893	0.000596835	0.0271317
chr18	70203915	70211774	CBLN2|CBLN2-001|ENSG00000141668.5|ENST00000269503.4|protein_coding	-0.749724	0.000399976	0.0206283
chr20	32399110	32442172	CHMP4B|CHMP4B-001|ENSG00000101421.3|ENST00000217402.2|protein_coding	-0.491667	2.88187e-06	0.000495595
chr2	239152679	239197250	PER2|PER2-001|ENSG00000132326.7|ENST00000254657.3|protein_coding	-0.430725	0.000823575	0.03404
chr6	114178541	114184648	MARCKS|MARCKS-001|ENSG00000155130.5|ENST00000368635.4|protein_coding	-0.55926	0.000704753	0.030597
chr5	17217669	17276943	BASP1|BASP1-001|ENSG00000176788.7|ENST00000322611.3|protein_coding	-0.648952	2.05909e-06	0.00037674
chrX	150866779	150874396	PRRG3|PRRG3-001|ENSG00000130032.11|ENST00000370353.3|protein_coding	-0.897812	1.58158e-05	0.00188791
chr16	80631803	80838226	CDYL2|CDYL2-001|ENSG00000166446.10|ENST00000570137.2|protein_coding	-0.544212	0.000787061	0.0331406
chr19	56598732	56632649	ZNF787|ZNF787-001|ENSG00000142409.4|ENST00000270459.3|protein_coding	-0.521648	0.000634149	0.02825
chr12	52214243	52216199	RP11-923I11.7|RP11-923I11.7-001|ENSG00000261308.1|ENST00000564840.1|pseudogene	-0.81484	1.51247e-05	0.00183032
chr1	54691105	54822491	SSBP3|SSBP3-012|ENSG00000157216.11|ENST00000326956.7|protein_coding	-0.446736	2.95791e-05	0.0031137
chr19	10426147	10431354	CTD-2369P2.12|CTD-2369P2.12-001|ENSG00000267303.1|ENST00000586529.1|protein_coding	-0.449006	0.000390481	0.0204126
chr1	1470554	1475737	TMEM240|TMEM240-001|ENSG00000205090.4|ENST00000378733.4|protein_coding	-0.758961	0.000574944	0.0266047
chr20	33292094	33301243	TP53INP2|TP53INP2-001|ENSG00000078804.8|ENST00000374810.3|protein_coding	-0.686659	6.41663e-06	0.000966835
chr20	33302578	33409442	NCOA6|NCOA6-001|ENSG00000198646.9|ENST00000374796.2|protein_coding	-0.459982	4.44422e-05	0.00424244
chr7	27145803	27159214	HOXA3|HOXA3-001|ENSG00000105997.18|ENST00000396352.4|protein_coding	-0.991351	5.4486e-09	2.14717e-06
chr15	96873946	96883492	NR2F2|NR2F2-001|ENSG00000185551.8|ENST00000394166.3|protein_coding	-0.514601	0.000564652	0.0263773
chr16	2227184	2246526	CASKIN1|CASKIN1-001|ENSG00000167971.14|ENST00000343516.6|protein_coding	-0.602452	8.7652e-05	0.00709012
chr19	14198652	14201520	SAMD1|SAMD1-001|ENSG00000141858.7|ENST00000533683.2|protein_coding	-0.542342	0.000117843	0.00879188
chr11	2150351	2151194	AC132217.4|AC132217.4-001|ENSG00000240801.1|ENST00000430034.1|processed_transcript	-1.06389	8.69531e-13	1.11365e-09
chr11	34073230	34122703	CAPRIN1|CAPRIN1-001|ENSG00000135387.15|ENST00000341394.4|protein_coding	-0.351055	0.000310845	0.0175639
chr19	37264055	37267980	CTD-2162K18.4|CTD-2162K18.4-001|ENSG00000267260.1|ENST00000590750.1|protein_coding	-1.02013	2.83842e-06	0.000495595
chr17	45286714	45301045	MYL4|MYL4-001|ENSG00000198336.5|ENST00000393450.1|protein_coding	-0.632403	0.0010868	0.0419673
chrX	101408680	101410762	BEX5|BEX5-201|ENSG00000184515.6|ENST00000543160.1|protein_coding	-0.56762	0.00115422	0.0430562
chrM	1671	3229	MT-RNR2|MT-RNR2-201|ENSG00000210082.2|ENST00000387347.2|Mt_rRNA	-0.853657	1.60289e-09	8.49476e-07
chr7	27138458	27139758	HOTAIRM1|HOTAIRM1-003|ENSG00000233429.5|ENST00000428939.3|antisense	-0.59353	0.00020502	0.0129669
chr19	4472284	4502223	HDGFRP2|HDGFRP2-001|ENSG00000167674.10|ENST00000301284.4|protein_coding	-0.397469	0.000736111	0.0316899
chr12	54762920	54778507	ZNF385A|ZNF385A-007|ENSG00000161642.13|ENST00000394313.2|protein_coding	-0.645357	0.000164243	0.0110229
chr14	38059189	38064239	FOXA1|FOXA1-001|ENSG00000129514.4|ENST00000250448.2|protein_coding	-0.401475	0.000412765	0.0210059
chrX	101380660	101382683	TCEAL2|TCEAL2-201|ENSG00000184905.4|ENST00000372780.1|protein_coding	-0.707376	0.00127109	0.0448668
chr20	20348765	20351590	INSM1|INSM1-001|ENSG00000173404.3|ENST00000310227.1|protein_coding	-0.542393	0.000495397	0.0240182
chr19	7069471	7087979	ZNF557|ZNF557-201|ENSG00000130544.7|ENST00000414706.1|protein_coding	-0.515303	0.00120604	0.0433075
chr12	4382938	4414516	CCND2|CCND2-001|ENSG00000118971.3|ENST00000261254.3|protein_coding	-0.664024	0.000576444	0.0266047
chr11	65190269	65213011	NEAT1|NEAT1-001|ENSG00000245532.4|ENST00000501122.2|lincRNA	-0.639662	0.000340722	0.0184623
chr17	43037061	43045439	C1QL1|C1QL1-001|ENSG00000131094.3|ENST00000253407.3|protein_coding	-0.792837	1.45059e-05	0.00178352
chr19	5587010	5622991	SAFB2|SAFB2-001|ENSG00000130254.7|ENST00000252542.4|protein_coding	-0.427752	0.000827828	0.03404
chr7	104654626	104754532	KMT2E|KMT2E-001|ENSG00000005483.15|ENST00000311117.3|protein_coding	-0.3931	0.0010701	0.041742
chr11	117014983	117041761	PAFAH1B2|PAFAH1B2-001|ENSG00000168092.9|ENST00000527958.1|protein_coding	-0.388508	0.000443526	0.0222037
chr11	2161747	2169894	IGF2-AS|IGF2-AS-001|ENSG00000099869.6|ENST00000381361.3|antisense	-0.62014	0.000155219	0.0107386
chr15	35080297	35088340	ACTC1|ACTC1-001|ENSG00000159251.6|ENST00000290378.4|protein_coding	-1.3691	8.10288e-11	6.41726e-08
chr18	6941743	7117813	LAMA1|LAMA1-001|ENSG00000101680.9|ENST00000389658.3|protein_coding	-0.695506	0.000105598	0.00811466
chrM	14747	15887	MT-CYB|MT-CYB-201|ENSG00000198727.2|ENST00000361789.2|protein_coding	-0.375771	7.38367e-05	0.00626918
chr7	69064319	70258054	AUTS2|AUTS2-001|ENSG00000158321.11|ENST00000342771.4|protein_coding	-0.502171	2.33989e-05	0.00270389
chr19	1815248	1848452	REXO1|REXO1-001|ENSG00000079313.7|ENST00000170168.4|protein_coding	-0.621233	1.77946e-05	0.00208767
chr15	65032097	65067786	RBPMS2|RBPMS2-001|ENSG00000166831.4|ENST00000300069.4|protein_coding	-0.666886	0.000114014	0.00863193
chr16	81478775	81745367	CMIP|CMIP-001|ENSG00000153815.12|ENST00000537098.3|protein_coding	-0.519061	2.55225e-05	0.00286711
chr19	45542779	45574212	CLASRP|CLASRP-004|ENSG00000104859.10|ENST00000544944.2|protein_coding	-0.439083	0.00141666	0.04791
chr19	41768401	41813503	HNRNPUL1|HNRNPUL1-001|ENSG00000105323.12|ENST00000352456.3|protein_coding	-0.39071	0.000210143	0.0131015
chr19	2236520	2248678	SF3A2|SF3A2-001|ENSG00000104897.5|ENST00000221494.5|protein_coding	-0.624999	7.8087e-05	0.00648713
chr19	50094900	50129696	PRR12|PRR12-001|ENSG00000126464.9|ENST00000418929.2|protein_coding	-0.462268	0.00117593	0.0432803
chr5	2745959	2751776	IRX2|IRX2-001|ENSG00000170561.8|ENST00000382611.6|protein_coding	-0.56519	6.23876e-05	0.00538932
chr19	6413359	6424805	KHSRP|KHSRP-001|ENSG00000088247.11|ENST00000398148.3|protein_coding	-0.439361	1.10223e-05	0.0014356
chr1	24969503	24999758	SRRM1|SRRM1-001|ENSG00000133226.12|ENST00000323848.9|protein_coding	-0.461293	3.67409e-05	0.0036667
chr19	15347647	15391262	BRD4|BRD4-001|ENSG00000141867.13|ENST00000263377.2|protein_coding	-0.797123	2.26358e-12	2.48492e-09
chr2	70223904	70315978	PCBP1-AS1|PCBP1-AS1-054|ENSG00000179818.9|ENST00000596028.1|antisense	-0.388161	0.00121682	0.0435927
chrX	62646440	62651492	RP11-357C3.3|RP11-357C3.3-004|ENSG00000235437.3|ENST00000608623.1|processed_transcript	-0.562346	0.000114762	0.00864594
chr8	28351773	28431775	FZD3|FZD3-001|ENSG00000104290.6|ENST00000240093.3|protein_coding	-0.611872	9.86465e-05	0.00781494
chr19	47567444	47617009	ZC3H4|ZC3H4-001|ENSG00000130749.5|ENST00000253048.5|protein_coding	-0.483274	8.31581e-05	0.00683453
chr14	55518349	55536910	MAPK1IP1L|MAPK1IP1L-001|ENSG00000168175.10|ENST00000395468.4|protein_coding	-0.359994	0.000269898	0.0157721
chr12	54624724	54673886	CBX5|CBX5-002|ENSG00000094916.9|ENST00000209875.4|protein_coding	-0.479565	2.75756e-05	0.00301801
chr20	60549854	60640866	TAF4|TAF4-001|ENSG00000130699.12|ENST00000252996.4|protein_coding	-0.556383	0.000184157	0.0118921
chr8	126442563	126450647	TRIB1|TRIB1-001|ENSG00000173334.3|ENST00000311922.3|protein_coding	-0.455068	0.00124986	0.0444656
chr7	29874341	29956682	WIPF3|WIPF3-002|ENSG00000122574.6|ENST00000409290.1|protein_coding	-0.63736	0.000138868	0.00983534
chr17	7743222	7758114	KDM6B|KDM6B-001|ENSG00000132510.6|ENST00000254846.5|protein_coding	-0.604206	3.27616e-07	8.39189e-05
chr1	201328136	201346808	TNNT2|TNNT2-004|ENSG00000118194.14|ENST00000491504.1|protein_coding	-0.926589	5.32708e-06	0.000826989
chr13	39584003	39612213	PROSER1|PROSER1-003|ENSG00000120685.15|ENST00000352251.3|protein_coding	-0.485346	3.70315e-06	0.000599092
chr19	39797208	39805976	LRFN1|LRFN1-001|ENSG00000128011.4|ENST00000248668.4|protein_coding	-0.6404	0.000466544	0.02313
chr11	2150342	2160619	IGF2|IGF2-001|ENSG00000167244.13|ENST00000416167.2|protein_coding	-1.49239	3.39998e-24	5.22543e-21
chrM	10760	12137	MT-ND4|MT-ND4-201|ENSG00000198886.2|ENST00000361381.2|protein_coding	-0.357419	0.00124859	0.0444656
chr4	980785	998294	IDUA|IDUA-001|ENSG00000127415.8|ENST00000247933.4|protein_coding	-0.617304	0.000660413	0.0291664
chr3	129033615	129035120	H1FX|H1FX-001|ENSG00000184897.4|ENST00000333762.4|protein_coding	-0.536484	0.00112078	0.0425942
chr14	104605377	104647231	KIF26A|KIF26A-001|ENSG00000066735.10|ENST00000315264.7|protein_coding	-0.68979	2.45976e-05	0.0028003
chr20	31407699	31438211	MAPRE1|MAPRE1-001|ENSG00000101367.8|ENST00000375571.5|protein_coding	-0.405012	0.000310334	0.0175639
chr6	136663875	136871957	MAP7|MAP7-001|ENSG00000135525.14|ENST00000354570.3|protein_coding	-0.421514	0.000159256	0.0107595
chr8	145751117	145754516	C8orf82|C8orf82-001|ENSG00000213563.2|ENST00000524821.1|protein_coding	-0.626806	0.000313648	0.0175929
chr20	31030862	31071274	C20orf112|C20orf112-001|ENSG00000197183.8|ENST00000359676.5|protein_coding	-0.587766	1.69429e-08	6.1999e-06
chr19	56102746	56110893	FIZ1|FIZ1-001|ENSG00000179943.6|ENST00000221665.3|protein_coding	-0.54399	0.000989398	0.0395991
chrX	70520580	70520897	AL590762.1|AL590762.1-201|ENSG00000255591.1|ENST00000536900.1|pseudogene	-0.616489	1.17929e-09	6.71278e-07
chr16	2076869	2089027	SLC9A3R2|SLC9A3R2-001|ENSG00000065054.9|ENST00000424542.2|protein_coding	-0.710159	0.000259127	0.0153174
chr7	6144515	6201195	USP42|USP42-005|ENSG00000106346.7|ENST00000306177.5|protein_coding	-0.43629	0.000456	0.0226805
chr7	156797547	156803345	MNX1|MNX1-001|ENSG00000130675.10|ENST00000252971.6|protein_coding	-0.730865	3.05186e-07	8.0729e-05
chr1	6581407	6614595	NOL9|NOL9-001|ENSG00000162408.10|ENST00000377705.5|protein_coding	-0.410703	0.00148056	0.0493595
chr20	30327074	30389608	TPX2|TPX2-002|ENSG00000088325.11|ENST00000340513.4|protein_coding	-0.671803	1.04174e-05	0.00138022
chr20	30448870	30458028	DUSP15|DUSP15-005|ENSG00000149599.11|ENST00000486996.1|protein_coding	-0.715827	0.00114797	0.043032
chr12	124420964	124431320	CCDC92|CCDC92-002|ENSG00000119242.4|ENST00000545135.1|protein_coding	-0.412103	0.000288675	0.0166791
chr6	30594653	30612456	ATAT1|ATAT1-003|ENSG00000137343.13|ENST00000376483.4|protein_coding	-0.562805	0.000208923	0.0131015
chr16	55512883	55540603	MMP2|MMP2-001|ENSG00000087245.8|ENST00000219070.4|protein_coding	-0.572116	0.00088535	0.0359972
chr1	43148098	43168020	YBX1|YBX1-001|ENSG00000065978.13|ENST00000321358.7|protein_coding	-0.332753	0.00123746	0.0442292
chr17	7191582	7197908	YBX2|YBX2-003|ENSG00000006047.8|ENST00000571485.1|protein_coding	-0.845107	0.000113446	0.00863141
chr7	131185021	131241322	PODXL|PODXL-003|ENSG00000128567.12|ENST00000446198.1|protein_coding	-0.456944	0.000129739	0.00927421
chr19	50145382	50161899	SCAF1|SCAF1-001|ENSG00000126461.10|ENST00000360565.3|protein_coding	-0.53179	0.000485213	0.0237492
chr1	200938520	200992828	KIF21B|KIF21B-002|ENSG00000116852.10|ENST00000332129.2|protein_coding	-0.429854	0.00111402	0.0424847
chr20	5476713	5485259	LINC00654|LINC00654-001|ENSG00000205181.5|ENST00000379053.4|lincRNA	-0.804042	4.61861e-05	0.00430202
chr19	48988528	49016446	LMTK3|LMTK3-001|ENSG00000142235.4|ENST00000270238.3|protein_coding	-0.72068	0.000103223	0.00801229
chrX	47431303	47479252	SYN1|SYN1-002|ENSG00000008056.8|ENST00000340666.4|protein_coding	-0.698464	0.00086958	0.0355441
chr11	66330934	66336067	CTSF|CTSF-001|ENSG00000174080.6|ENST00000310325.5|protein_coding	-2.48254	9.55919e-30	2.09879e-26
chr1	29445940	29450447	TMEM200B|TMEM200B-001|ENSG00000253304.1|ENST00000521452.1|protein_coding	-0.733008	2.37213e-06	0.000426765
chr19	3359561	3469215	NFIC|NFIC-001|ENSG00000141905.13|ENST00000589123.1|protein_coding	-0.965955	1.07913e-07	3.18945e-05
chr19	1451288	1473237	APC2|APC2-004|ENSG00000115266.7|ENST00000535453.1|protein_coding	-0.710615	0.000175207	0.0115569
chr17	48211104	48227877	PPP1R9B|PPP1R9B-201|ENSG00000108819.9|ENST00000316878.6|protein_coding	-0.506493	1.58462e-05	0.00188791
chr8	101715144	101734940	PABPC1|PABPC1-001|ENSG00000070756.9|ENST00000318607.5|protein_coding	-0.492165	5.60413e-06	0.000861299
chr17	48796905	48833574	LUC7L3|LUC7L3-001|ENSG00000108848.11|ENST00000505658.1|protein_coding	-0.558337	0.000189402	0.0121796
chr15	53049638	53082209	ONECUT1|ONECUT1-001|ENSG00000169856.7|ENST00000305901.5|protein_coding	-0.723629	0.000338984	0.0184623
chr19	56153418	56154835	ZNF580|ZNF580-002|ENSG00000213015.4|ENST00000543039.1|protein_coding	-0.590638	0.000626966	0.0280928
chr14	105886159	105937066	MTA1|MTA1-001|ENSG00000182979.13|ENST00000331320.7|protein_coding	-0.650883	6.29399e-07	0.000146564
chr14	100437786	100610573	EVL|EVL-006|ENSG00000196405.8|ENST00000402714.2|protein_coding	-0.501136	0.000150774	0.010533
chr19	7989372	7991051	CTXN1|CTXN1-001|ENSG00000178531.4|ENST00000318978.4|protein_coding	-0.674308	0.00101246	0.0401039
chr3	133464800	133497850	TF|TF-001|ENSG00000091513.10|ENST00000402696.3|protein_coding	-2.16942	1.7428e-26	2.97613e-23
chr16	1359636	1377019	UBE2I|UBE2I-004|ENSG00000103275.14|ENST00000397515.2|protein_coding	-0.359709	0.0011984	0.0432803
chr1	20808884	20812713	CAMK2N1|CAMK2N1-001|ENSG00000162545.5|ENST00000375078.3|protein_coding	-0.388175	0.000442108	0.0222037
chr2	85128767	85134132	TRABD2A|TRABD2A-004|ENSG00000186854.6|ENST00000489999.1|protein_coding	-0.789947	0.000211284	0.0131015
chr20	35060121	35157038	DLGAP4|DLGAP4-201|ENSG00000080845.13|ENST00000339266.5|protein_coding	-0.361488	0.000373898	0.0196124
chr19	14072350	14117097	RFX1|RFX1-001|ENSG00000132005.4|ENST00000254325.4|protein_coding	-0.574041	0.000199896	0.0126951
chr2	224839829	224904036	SERPINE2|SERPINE2-001|ENSG00000135919.8|ENST00000258405.4|protein_coding	-0.548903	0.00109055	0.0420065
chr19	24269995	24312654	ZNF254|ZNF254-001|ENSG00000213096.5|ENST00000357002.4|protein_coding	-0.62746	1.48645e-05	0.00181312
chr19	56088899	56092187	ZNF579|ZNF579-001|ENSG00000218891.2|ENST00000325421.4|protein_coding	-1.09222	2.01668e-08	7.12383e-06
chr12	111890018	112037154	ATXN2|ATXN2-025|ENSG00000204842.10|ENST00000608853.1|protein_coding	-0.552963	3.26422e-06	0.000545302
chr13	28494157	28500368	PDX1|PDX1-001|ENSG00000139515.5|ENST00000381033.4|protein_coding	-0.404115	0.000873152	0.0355954
