# Supplementary material for: Pancreatic progenitor epigenome maps prioritize type 2 diabetes risk genes with roles in development
Source: eLife. 2021 Feb 5;10:e59067. doi: 10.7554/eLife.59067 (PMC7864636; doi:10.7554/eLife.59067)
Supplement: Figure 4—source data 2. [file elife-59067-fig4-data2.xlsx]

## Sheet: 2
Figure 4 – source data 2: Genes upregulated in ∆LAMA1Enh PP2 stage cells compared to control cells (p adj. < .05).
chr	start	end	Gene ID	Log2-fold Change	p-value	adj. p-value
chr2	220110177	220115059	STK16|STK16-001|ENSG00000115661.9|ENST00000409638.3|protein_coding	0.47834	0.000695006	0.0304317
chr9	136325109	136335970	CACFD1|CACFD1-001|ENSG00000160325.10|ENST00000316948.4|protein_coding	0.565711	0.00034116	0.0184623
chr19	42363988	42376994	RPS19|RPS19-001|ENSG00000105372.2|ENST00000598742.1|protein_coding	0.608405	0.000125816	0.0091211
chr14	89290968	89344335	TTC8|TTC8-001|ENSG00000165533.14|ENST00000345383.5|protein_coding	0.446506	0.000476582	0.0234762
chr20	57603733	57607400	ATP5E|ATP5E-002|ENSG00000124172.5|ENST00000395659.1|protein_coding	0.814542	4.21109e-10	2.69667e-07
chr7	127231546	127233665	GCC1|GCC1-003|ENSG00000179562.2|ENST00000473728.1|protein_coding	0.641262	0.000446396	0.0222748
chr4	89442199	89444964	HERC3|HERC3-013|ENSG00000138641.11|ENST00000601319.1|protein_coding	0.465944	0.000332153	0.018297
chrX	118920469	118925558	RPL39|RPL39-002|ENSG00000198918.7|ENST00000468844.1|protein_coding	0.722223	0.00055437	0.025976
chr20	10381657	10414870	MKKS|MKKS-001|ENSG00000125863.13|ENST00000347364.3|protein_coding	0.507894	0.000205887	0.0129684
chr16	67261060	67263181	TMEM208|TMEM208-002|ENSG00000168701.14|ENST00000562235.1|protein_coding	0.703025	4.74022e-06	0.00075888
chr14	78174414	78183941	SLIRP|SLIRP-001|ENSG00000119705.5|ENST00000557342.1|protein_coding	0.613838	8.06427e-05	0.00666343
chr6	133135708	133138703	RPS12|RPS12-002|ENSG00000112306.7|ENST00000484616.2|protein_coding	0.942175	8.35091e-11	6.41726e-08
chr6	41755400	41757636	TOMM6|TOMM6-001|ENSG00000214736.3|ENST00000398884.3|protein_coding	0.429584	0.000593475	0.0270679
chr12	50506020	50514234	COX14|COX14-003|ENSG00000178449.4|ENST00000548985.1|protein_coding	0.580171	0.00113443	0.0429435
chr11	116706467	116708330	APOA1|APOA1-003|ENSG00000118137.5|ENST00000375323.1|protein_coding	0.691736	3.68641e-06	0.000599092
chr2	55459931	55462745	RPS27A|RPS27A-005|ENSG00000143947.8|ENST00000495843.1|protein_coding	0.857013	8.0752e-08	2.51854e-05
chr8	56985601	56987065	RPS20|RPS20-004|ENSG00000008988.5|ENST00000524349.1|protein_coding	0.636743	3.95658e-05	0.00387317
chr1	202930997	202936408	CYB5R1|CYB5R1-001|ENSG00000159348.8|ENST00000367249.4|protein_coding	0.47734	0.00107887	0.0418432
chr2	176040986	176049335	ATP5G3|ATP5G3-001|ENSG00000154518.5|ENST00000284727.4|protein_coding	0.476176	0.000295237	0.016931
chr11	57252007	57283259	SLC43A1|SLC43A1-001|ENSG00000149150.4|ENST00000278426.3|protein_coding	0.507408	0.00142872	0.048069
chr21	37536833	37666572	DOPEY2|DOPEY2-001|ENSG00000142197.8|ENST00000399151.3|protein_coding	0.396627	0.00137895	0.047272
chr12	28115255	28124916	PTHLH|PTHLH-201|ENSG00000087494.11|ENST00000201015.4|protein_coding	0.815116	6.01286e-05	0.00529554
chr5	52856477	52979168	NDUFS4|NDUFS4-004|ENSG00000164258.7|ENST00000506974.1|protein_coding	0.508276	0.000427108	0.0215928
chr11	44587141	44641913	CD82|CD82-001|ENSG00000085117.7|ENST00000227155.4|protein_coding	0.667229	6.24178e-05	0.00538932
chr10	75135203	75173825	ANXA7|ANXA7-002|ENSG00000138279.11|ENST00000372919.4|protein_coding	0.484878	3.28271e-05	0.00338604
chr22	29950797	29977326	NIPSNAP1|NIPSNAP1-001|ENSG00000184117.7|ENST00000216121.7|protein_coding	0.320058	0.000724001	0.0312561
chr20	34129787	34145405	ERGIC3|ERGIC3-003|ENSG00000125991.14|ENST00000357394.4|protein_coding	0.387705	0.000318776	0.0176901
chr11	114310108	114321001	REXO2|REXO2-001|ENSG00000076043.5|ENST00000265881.5|protein_coding	0.543596	0.00115249	0.0430562
chr7	22852251	22862470	TOMM7|TOMM7-001|ENSG00000196683.6|ENST00000358435.4|protein_coding	0.845377	1.0385e-07	3.12956e-05
chr3	39448180	39454033	RPSA|RPSA-001|ENSG00000168028.9|ENST00000301821.6|protein_coding	0.735193	6.0298e-05	0.00529554
chr13	111268008	111292340	CARKD|CARKD-001|ENSG00000213995.7|ENST00000309957.2|protein_coding	0.382233	0.00107889	0.0418432
chr8	100890094	100906290	COX6C|COX6C-001|ENSG00000164919.6|ENST00000520468.2|protein_coding	0.435882	0.000490889	0.0238749
chr5	139624624	139682706	PFDN1|PFDN1-001|ENSG00000113068.5|ENST00000261813.4|protein_coding	0.402455	0.00140478	0.0476626
chr15	69745158	69747885	RPLP1|RPLP1-003|ENSG00000137818.7|ENST00000487304.2|protein_coding	0.762929	1.40392e-06	0.000280218
chr14	23563974	23569665	C14orf119|C14orf119-001|ENSG00000179933.4|ENST00000319074.4|protein_coding	0.435904	0.000568175	0.0264615
chr1	154897210	154909467	PMVK|PMVK-001|ENSG00000163344.5|ENST00000368467.3|protein_coding	0.490267	0.000765728	0.03242
chr11	118886436	118889401	RPS25|RPS25-008|ENSG00000118181.6|ENST00000527853.1|protein_coding	0.501195	0.000805114	0.0337082
chr11	63742079	63744015	COX8A|COX8A-001|ENSG00000176340.3|ENST00000314133.3|protein_coding	0.598445	0.000131718	0.00937209
chr17	46029333	46035244	PRR15L|PRR15L-001|ENSG00000167183.2|ENST00000300557.2|protein_coding	0.488354	0.0010152	0.0401039
chr14	23495060	23504354	PSMB5|PSMB5-002|ENSG00000100804.14|ENST00000361611.6|protein_coding	0.553254	3.5603e-06	0.000588368
chr18	47008546	47017956	RPL17-C18orf32|RPL17-C18orf32-002|ENSG00000215472.5|ENST00000577910.1|protein_coding	0.393769	0.00137215	0.047272
chrX	100645999	100667285	RPL36A-HNRNPH2|RPL36A-HNRNPH2-001|ENSG00000257529.1|ENST00000409338.1|protein_coding	0.873046	2.03948e-08	7.12383e-06
chr12	49412758	49449107	KMT2D|KMT2D-001|ENSG00000167548.10|ENST00000301067.7|protein_coding	0.495356	0.000572295	0.0265728
chrX	130407485	130533677	IGSF1|IGSF1-001|ENSG00000147255.13|ENST00000370904.1|protein_coding	0.653846	0.00111243	0.0424847
chr12	57106219	57119040	NACA|NACA-002|ENSG00000196531.6|ENST00000552540.1|protein_coding	0.440265	0.00119274	0.0432803
chr14	50053297	50053596	RN7SL1|RN7SL1-001|ENSG00000258486.2|ENST00000553637.1|antisense	0.736443	0.000827289	0.03404
chr2	3622948	3628508	RPS7|RPS7-002|ENSG00000171863.8|ENST00000481006.1|protein_coding	0.594713	0.000180194	0.0117847
chr1	120290619	120311517	HMGCS2|HMGCS2-001|ENSG00000134240.7|ENST00000369406.3|protein_coding	0.790388	5.25612e-09	2.12582e-06
chr16	2821415	2827298	TCEB2|TCEB2-001|ENSG00000103363.10|ENST00000409906.4|protein_coding	0.467936	0.000500646	0.0241097
chr12	6976283	6980112	TPI1|TPI1-001|ENSG00000111669.10|ENST00000229270.4|protein_coding	0.51955	0.000318835	0.0176901
chrX	100645977	100650781	RPL36A|RPL36A-004|ENSG00000241343.5|ENST00000392994.3|protein_coding	0.757421	2.02484e-06	0.000374937
chr11	62382769	62389626	B3GAT3|B3GAT3-002|ENSG00000149541.5|ENST00000531383.1|protein_coding	0.624774	0.000291823	0.0167978
chr12	84665119	84688341	RP11-788H18.1|RP11-788H18.1-001|ENSG00000257729.1|ENST00000547882.1|lincRNA	0.795024	0.000269252	0.0157721
chr19	18682670	18688360	UBA52|UBA52-001|ENSG00000221983.3|ENST00000442744.2|protein_coding	0.517176	1.69758e-06	0.000322101
chr6	39282597	39290316	KCNK16|KCNK16-003|ENSG00000095981.6|ENST00000425054.2|protein_coding	0.519053	0.000716143	0.0310039
chr6	170844205	170862429	PSMB1|PSMB1-001|ENSG00000008018.8|ENST00000262193.6|protein_coding	0.477689	9.3883e-05	0.0074761
chr17	48445229	48450568	MRPL27|MRPL27-002|ENSG00000108826.11|ENST00000442592.3|protein_coding	0.461598	0.00133844	0.0465397
chr9	19376283	19380196	RPS6|RPS6-003|ENSG00000137154.8|ENST00000315377.4|protein_coding	0.438163	0.000820619	0.03404
chr3	9834242	9849410	ARPC4|ARPC4-001|ENSG00000241553.8|ENST00000397261.3|protein_coding	0.409925	0.00113768	0.0429606
chr13	76099355	76112938	COMMD6|COMMD6-001|ENSG00000188243.8|ENST00000377615.3|protein_coding	0.496412	0.0004385	0.0220961
chr2	7017796	7038370	RSAD2|RSAD2-001|ENSG00000134321.7|ENST00000382040.3|protein_coding	0.534002	3.53076e-05	0.00357002
chr16	81009699	81040476	CMC2|CMC2-014|ENSG00000103121.4|ENST00000570195.1|protein_coding	0.591936	0.000220102	0.0135853
chr19	58897767	58906173	RPS5|RPS5-001|ENSG00000083845.4|ENST00000601521.1|protein_coding	0.406144	0.00134629	0.0466016
chr1	24018269	24022915	RPL11|RPL11-001|ENSG00000142676.8|ENST00000374550.3|protein_coding	0.574803	7.17607e-08	2.29769e-05
chr11	111957497	111966518	SDHD|SDHD-001|ENSG00000204370.4|ENST00000375549.3|protein_coding	0.563487	0.000581408	0.0266736
chr17	4402133	4442330	SPNS2|SPNS2-001|ENSG00000183018.4|ENST00000329078.3|protein_coding	0.613601	0.000774609	0.032706
chr17	61600764	61624088	KCNH6|KCNH6-005|ENSG00000173826.10|ENST00000583023.1|protein_coding	0.522684	0.00119968	0.0432803
chr13	47345391	47371367	ESD|ESD-001|ENSG00000139684.9|ENST00000378720.3|protein_coding	0.426131	0.000580732	0.0266736
chr4	109541812	109551568	RPL34|RPL34-003|ENSG00000109475.12|ENST00000394668.2|protein_coding	0.667413	5.50584e-05	0.00497761
chr15	45119398	45176892	CTD-2008A1.2|CTD-2008A1.2-002|ENSG00000259479.2|ENST00000561384.2|pseudogene	0.750739	3.44566e-05	0.00350704
chr12	120941077	120966985	COQ5|COQ5-001|ENSG00000110871.10|ENST00000288532.6|protein_coding	0.728793	1.13676e-07	3.29639e-05
chr1	19923561	19983419	MINOS1-NBL1|MINOS1-NBL1-003|ENSG00000270136.1|ENST00000602293.1|protein_coding	0.605248	0.00150364	0.0498325
chr2	217362912	217368274	RPL37A|RPL37A-001|ENSG00000197756.5|ENST00000491306.1|protein_coding	0.551039	1.56603e-06	0.000304403
chr12	56552140	56555371	MYL6|MYL6-024|ENSG00000092841.14|ENST00000348108.4|protein_coding	0.402197	0.000244161	0.0147434
chr3	141457046	141466402	RNF7|RNF7-001|ENSG00000114125.9|ENST00000273480.3|protein_coding	0.522723	4.06011e-05	0.00392452
chr11	2016406	2019105	H19|H19-001|ENSG00000130600.11|ENST00000414790.1|processed_transcript	1.34718	3.79761e-13	5.30596e-10
chr5	40825364	40835437	RPL37|RPL37-001|ENSG00000145592.9|ENST00000274242.5|protein_coding	0.531078	7.14233e-06	0.00104543
chr12	110825268	110883353	RP11-478C19.2|RP11-478C19.2-001|ENSG00000258210.1|ENST00000550231.1|processed_transcript	0.616547	0.000475263	0.0234762
chr1	150237806	150241703	APH1A|APH1A-001|ENSG00000117362.8|ENST00000360244.4|protein_coding	0.474184	0.000691931	0.0303837
chr7	143548468	143599248	FAM115A|FAM115A-001|ENSG00000198420.5|ENST00000479870.1|protein_coding	0.512746	0.00108086	0.0418432
chr14	21677295	21737653	HNRNPC|HNRNPC-001|ENSG00000092199.13|ENST00000336053.6|protein_coding	0.472417	1.03597e-05	0.00138022
chrX	105969894	106040223	RNF128|RNF128-001|ENSG00000133135.9|ENST00000255499.2|protein_coding	0.367255	0.00142934	0.048069
chr1	234509202	234519795	COA6|COA6-001|ENSG00000168275.10|ENST00000366615.4|protein_coding	0.552941	0.00150447	0.0498325
chr1	203830743	203839678	SNRPE|SNRPE-001|ENSG00000182004.8|ENST00000414487.2|protein_coding	0.716873	0.000182762	0.0118518
chrX	12993229	12995345	TMSB4X|TMSB4X-003|ENSG00000205542.6|ENST00000380636.1|protein_coding	0.921681	9.36987e-12	9.60037e-09
chr2	39103103	39109850	MORN2|MORN2-001|ENSG00000188010.8|ENST00000340556.6|protein_coding	0.53137	0.00052643	0.0250486
chr21	27096791	27107984	ATP5J|ATP5J-002|ENSG00000154723.8|ENST00000400093.3|protein_coding	0.411106	0.000629441	0.0281218
chr4	48887036	48908845	OCIAD2|OCIAD2-002|ENSG00000145247.7|ENST00000508632.1|protein_coding	0.442694	0.000338596	0.0184623
chr17	4699439	4701790	PSMB6|PSMB6-001|ENSG00000142507.5|ENST00000270586.3|protein_coding	0.480685	3.8523e-05	0.00379525
chr22	36863083	36878077	TXN2|TXN2-001|ENSG00000100348.5|ENST00000216185.2|protein_coding	0.441737	0.000254197	0.0151424
chr14	21152746	21168735	AL163636.6|AL163636.6-001|ENSG00000259171.1|ENST00000553909.1|protein_coding	0.761799	2.60111e-05	0.002876
chr5	130494978	130500933	HINT1|HINT1-007|ENSG00000169567.7|ENST00000511475.1|protein_coding	0.498459	0.000324765	0.0179544
chr9	130209959	130213684	RPL12|RPL12-002|ENSG00000197958.8|ENST00000497322.1|protein_coding	0.397901	0.00139526	0.0475471
chr1	161007421	161008727	TSTD1|TSTD1-001|ENSG00000215845.6|ENST00000318289.10|protein_coding	0.700641	0.000245339	0.0147434
chr6	31694815	31698394	DDAH2|DDAH2-001|ENSG00000213722.4|ENST00000375792.3|protein_coding	0.662461	0.000127687	0.00921323
chr19	49468558	49470135	FTL|FTL-001|ENSG00000087086.9|ENST00000331825.6|protein_coding	0.555223	5.75379e-05	0.00514128
chr14	24630262	24635774	IRF9|IRF9-001|ENSG00000213928.4|ENST00000396864.3|protein_coding	0.671261	9.26003e-06	0.00125945
chr12	125396150	125399894	UBC|UBC-007|ENSG00000150991.10|ENST00000536769.1|protein_coding	0.529519	9.67819e-07	0.000209499
chr3	12875984	12883087	RPL32|RPL32-001|ENSG00000144713.8|ENST00000429711.2|protein_coding	0.468026	0.000159618	0.0107595
chr3	125725198	125802952	SLC41A3|SLC41A3-004|ENSG00000114544.11|ENST00000360370.4|protein_coding	0.403129	0.00147308	0.049217
chr19	4769293	4772529	MIR7-3HG|MIR7-3HG-005|ENSG00000176840.7|ENST00000588758.1|lincRNA	0.477343	0.000740579	0.0317932
chr22	19419425	19423598	MRPL40|MRPL40-001|ENSG00000185608.4|ENST00000333130.3|protein_coding	0.484261	0.00127532	0.0448668
chr17	73163408	73179078	SUMO2|SUMO2-001|ENSG00000188612.7|ENST00000420826.2|protein_coding	0.48089	5.05277e-05	0.00462239
chr2	101618177	101623729	RPL31|RPL31-001|ENSG00000071082.6|ENST00000264258.3|protein_coding	0.764208	2.70493e-08	8.92163e-06
chr1	110943871	110950316	LAMTOR5|LAMTOR5-002|ENSG00000134248.9|ENST00000464240.1|protein_coding	0.416289	0.00141838	0.04791
chr14	24898492	24910540	KHNYN|KHNYN-002|ENSG00000100441.5|ENST00000251343.5|protein_coding	0.371283	0.00118494	0.0432803
chr5	177019159	177023125	TMED9|TMED9-001|ENSG00000184840.7|ENST00000332598.6|protein_coding	0.601503	1.36825e-05	0.00172366
chr2	55746790	55773015	CCDC104|CCDC104-001|ENSG00000163001.7|ENST00000349456.4|protein_coding	0.395384	0.00145859	0.0488389
chr14	92582466	92588068	NDUFB1|NDUFB1-004|ENSG00000183648.5|ENST00000553514.1|protein_coding	0.537626	0.000360613	0.0191112
chr11	834527	838835	CD151|CD151-004|ENSG00000177697.13|ENST00000532045.1|protein_coding	0.523813	0.00103788	0.0406919
chr15	28356186	28567298	HERC2|HERC2-001|ENSG00000128731.11|ENST00000261609.7|protein_coding	0.55956	4.9611e-05	0.00456569
chr3	146232967	146262651	PLSCR1|PLSCR1-001|ENSG00000188313.8|ENST00000342435.4|protein_coding	0.650971	0.000121538	0.00898037
chr14	95047731	95059457	SERPINA5|SERPINA5-201|ENSG00000188488.9|ENST00000329597.7|protein_coding	0.831622	9.59389e-06	0.00129341
chr19	54704747	54711512	RPS9|RPS9-005|ENSG00000170889.9|ENST00000495002.1|protein_coding	0.615871	1.44145e-05	0.00178352
chr1	54497349	54519111	TMEM59|TMEM59-001|ENSG00000116209.7|ENST00000234831.5|protein_coding	0.368469	0.000282522	0.0164473
chr11	809647	812875	RPLP2|RPLP2-001|ENSG00000177600.4|ENST00000321153.4|protein_coding	0.729292	7.47821e-06	0.00106419
chr17	8280839	8286485	RPL26|RPL26-004|ENSG00000161970.8|ENST00000584164.1|protein_coding	0.570124	0.000157698	0.0107386
chr16	20320894	20338902	GP2|GP2-001|ENSG00000169347.12|ENST00000302555.5|protein_coding	0.750401	0.000120766	0.00896642
chr1	153579362	153585559	S100A16|S100A16-009|ENSG00000188643.6|ENST00000368706.4|protein_coding	0.80164	2.19837e-05	0.00255961
chr2	201936462	201950473	NDUFB3|NDUFB3-001|ENSG00000119013.4|ENST00000237889.4|protein_coding	0.509042	0.000942423	0.0382166
chrX	153626729	153629254	RPL10|RPL10-003|ENSG00000147403.12|ENST00000482732.1|protein_coding	0.743164	0.000173415	0.0114986
chr12	56623847	56631630	SLC39A5|SLC39A5-001|ENSG00000139540.7|ENST00000454355.2|protein_coding	0.650047	0.000156204	0.0107386
chr1	179050512	179065131	TOR3A|TOR3A-001|ENSG00000186283.9|ENST00000367627.3|protein_coding	0.536733	8.39015e-05	0.00685895
chr3	50337321	50341003	HYAL1|HYAL1-005|ENSG00000114378.12|ENST00000266031.4|protein_coding	1.03111	2.93442e-06	0.000495595
chr17	40925454	40931617	VPS25|VPS25-001|ENSG00000131475.2|ENST00000253794.2|protein_coding	0.370537	0.00148874	0.0495249
chr11	61556602	61560066	TMEM258|TMEM258-004|ENSG00000134825.9|ENST00000545210.1|protein_coding	0.685605	2.38804e-06	0.000426765
chr14	23502739	23502847	AL132780.1|AL132780.1-201|ENSG00000207765.1|ENST00000385031.1|miRNA	0.595343	0.000490227	0.0238749
chr1	6245080	6259672	RPL22|RPL22-001|ENSG00000116251.5|ENST00000234875.4|protein_coding	0.623363	1.1362e-05	0.00146742
chr2	177134123	177202753	MTX2|MTX2-002|ENSG00000128654.9|ENST00000420864.1|protein_coding	0.506657	0.00022404	0.0137182
chr19	49990865	49995562	RPL13A|RPL13A-002|ENSG00000142541.12|ENST00000488946.1|protein_coding	0.517553	6.15697e-05	0.0053765
chr11	71808338	71814433	LAMTOR1|LAMTOR1-001|ENSG00000149357.5|ENST00000278671.5|protein_coding	0.657697	4.58977e-07	0.000110219
chr12	120875893	120878545	COX6A1|COX6A1-001|ENSG00000111775.2|ENST00000229379.2|protein_coding	0.752748	6.77709e-07	0.000155458
chr19	46190712	46195591	SNRPD2|SNRPD2-001|ENSG00000125743.6|ENST00000342669.3|protein_coding	0.544022	2.81382e-05	0.00304547
chr11	118271869	118280560	ATP5L|ATP5L-001|ENSG00000167283.3|ENST00000300688.3|protein_coding	0.480668	0.000173576	0.0114986
chr19	9938568	9940791	UBL5|UBL5-001|ENSG00000198258.6|ENST00000358666.3|protein_coding	0.483695	0.000370843	0.0195188
chr11	6452279	6462294	HPX|HPX-001|ENSG00000110169.6|ENST00000265983.3|protein_coding	0.862666	2.43467e-05	0.00279242
chr5	132202325	132203379	UQCRQ|UQCRQ-003|ENSG00000164405.6|ENST00000498309.1|protein_coding	0.65454	6.50901e-06	0.000971233
chr6	34725331	34741571	SNRPC|SNRPC-002|ENSG00000124562.5|ENST00000374017.3|protein_coding	0.54078	6.25067e-06	0.000951154
chr5	76986991	77072185	TBCA|TBCA-001|ENSG00000171530.9|ENST00000380377.4|protein_coding	0.59256	1.29548e-06	0.00026547
chr10	72058729	72142345	LRRC20|LRRC20-001|ENSG00000172731.9|ENST00000373224.1|protein_coding	0.465346	0.000687433	0.0302726
chr6	161123274	161174338	PLG|PLG-001|ENSG00000122194.14|ENST00000308192.9|protein_coding	0.720496	0.000979234	0.0393975
chr11	867860	904923	CHID1|CHID1-204|ENSG00000177830.13|ENST00000454838.2|protein_coding	0.472416	9.1348e-05	0.00731212
chr1	206643791	206670223	IKBKE|IKBKE-001|ENSG00000143466.9|ENST00000367120.3|protein_coding	0.667868	0.0001951	0.0124419
chr5	133502861	133561762	CTD-2410N18.5|CTD-2410N18.5-001|ENSG00000272772.1|ENST00000519718.1|protein_coding	0.57063	4.02669e-05	0.00391684
chr1	54411750	54433841	LRRC42|LRRC42-002|ENSG00000116212.10|ENST00000371370.3|protein_coding	0.37185	0.00120247	0.0432803
chr17	55055509	55084129	SCPEP1|SCPEP1-002|ENSG00000121064.8|ENST00000576154.1|protein_coding	0.555353	0.000417244	0.0211638
chr8	144898547	144911196	PUF60|PUF60-003|ENSG00000179950.9|ENST00000453551.2|protein_coding	0.495432	0.000221398	0.0136106
chr17	7004641	7017972	ASGR2|ASGR2-002|ENSG00000161944.12|ENST00000355035.5|protein_coding	1.04115	2.72833e-08	8.92163e-06
chr1	153963239	153964621	RPS27|RPS27-003|ENSG00000177954.7|ENST00000493224.1|protein_coding	0.845124	8.51139e-06	0.0011892
chr5	151121877	151131987	ATOX1|ATOX1-002|ENSG00000177556.7|ENST00000521264.1|protein_coding	0.479458	0.000848121	0.0347594
chr3	139236276	139258671	RBP1|RBP1-001|ENSG00000114115.5|ENST00000232219.2|protein_coding	0.37119	0.00110397	0.0423114
chr4	140211071	140222364	NDUFC1|NDUFC1-202|ENSG00000109390.7|ENST00000539002.1|protein_coding	0.593924	4.60086e-05	0.00430202
chr1	27992575	27998689	IFI6|IFI6-003|ENSG00000126709.10|ENST00000339145.4|protein_coding	1.31394	2.52473e-09	1.21258e-06
chr14	50050290	50053094	RPS29|RPS29-001|ENSG00000213741.4|ENST00000245458.6|protein_coding	0.617351	0.00118992	0.0432803
chr13	77618792	77901177	MYCBP2|MYCBP2-203|ENSG00000005810.13|ENST00000407578.2|protein_coding	0.488091	0.00110117	0.0423097
chr6	90352218	90529442	MDN1|MDN1-005|ENSG00000112159.7|ENST00000369393.3|protein_coding	0.609349	0.000598455	0.0271317
chr19	35939203	35942669	FFAR2|FFAR2-001|ENSG00000126262.4|ENST00000599180.2|protein_coding	0.677626	7.38162e-06	0.00106419
chr17	78234667	78372586	RNF213|RNF213-020|ENSG00000173821.15|ENST00000582970.1|protein_coding	0.76103	4.13064e-09	1.81382e-06
chr15	78575577	78591947	WDR61|WDR61-006|ENSG00000140395.4|ENST00000558311.1|protein_coding	0.410627	0.00116107	0.0432069
chrX	153060114	153063948	SSR4|SSR4-008|ENSG00000180879.9|ENST00000460616.1|protein_coding	0.481967	0.00130421	0.0456593
chr1	153507075	153508698	S100A6|S100A6-009|ENSG00000197956.5|ENST00000368719.4|protein_coding	0.960546	1.42304e-07	4.05012e-05
chrX	71491892	71497150	RPS4X|RPS4X-001|ENSG00000198034.6|ENST00000316084.6|protein_coding	0.441133	0.000506192	0.0241604
chr1	42619092	42621495	GUCA2B|GUCA2B-001|ENSG00000044012.3|ENST00000372581.1|protein_coding	0.639311	0.000392664	0.0204571
chr3	10157276	10168874	BRK1|BRK1-001|ENSG00000254999.2|ENST00000530758.1|protein_coding	0.347685	0.0010052	0.0399198
chr1	159887897	159895522	TAGLN2|TAGLN2-001|ENSG00000158710.10|ENST00000368097.4|protein_coding	0.550852	0.00140485	0.0476626
chr1	45241308	45244451	RPS8|RPS8-004|ENSG00000142937.7|ENST00000485390.1|protein_coding	0.496984	3.10026e-05	0.00324135
chr11	33730246	33757985	CD59|CD59-002|ENSG00000085063.10|ENST00000395850.3|protein_coding	0.432184	0.000399165	0.0206283
chr1	161284047	161332984	SDHC|SDHC-001|ENSG00000143252.10|ENST00000367975.2|protein_coding	0.762903	1.42743e-05	0.00178352
chr1	173833039	173837127	GAS5|GAS5-002|ENSG00000234741.3|ENST00000431268.1|processed_transcript	0.576742	0.000253161	0.0151394
chr18	19230858	19284766	ABHD3|ABHD3-001|ENSG00000158201.5|ENST00000289119.2|protein_coding	0.536512	0.00133787	0.0465397
chr1	161136205	161141006	PPOX|PPOX-002|ENSG00000143224.13|ENST00000367999.4|protein_coding	0.505144	0.00102127	0.0401431
chr11	75110530	75117957	RPS3|RPS3-001|ENSG00000149273.10|ENST00000531188.1|protein_coding	0.383722	0.00048	0.0235691
chrX	102317579	102319168	BEX1|BEX1-001|ENSG00000133169.5|ENST00000372728.3|protein_coding	0.445847	0.000748418	0.0320402
chr13	27825446	27830705	RPL21|RPL21-001|ENSG00000122026.6|ENST00000311549.6|protein_coding	0.866755	4.7271e-07	0.00011177
chr1	46640759	46651630	TSPAN1|TSPAN1-001|ENSG00000117472.5|ENST00000372003.1|protein_coding	1.06409	2.49016e-09	1.21258e-06
chr19	8386384	8388224	RPS28|RPS28-001|ENSG00000233927.4|ENST00000600659.2|protein_coding	0.460958	0.000501991	0.0241097
chr11	61197545	61215001	SDHAF2|SDHAF2-001|ENSG00000167985.2|ENST00000301761.2|protein_coding	0.444997	0.00112243	0.0425942
chr21	35275757	35288072	ATP5O|ATP5O-002|ENSG00000241837.2|ENST00000491703.1|protein_coding	0.490965	3.58831e-05	0.00360449
chr13	45914174	45915318	RP11-290D2.6|RP11-290D2.6-001|ENSG00000273149.1|ENST00000610057.1|antisense	0.881095	7.12681e-11	6.08511e-08
chr11	64083932	64084959	TRMT112|TRMT112-004|ENSG00000173113.2|ENST00000535750.1|protein_coding	0.513476	0.00134616	0.0466016
chr17	73642517	73644057	SMIM6|SMIM6-001|ENSG00000259120.2|ENST00000579469.1|protein_coding	0.741579	3.65902e-07	9.07023e-05
chr14	24686063	24701509	NEDD8|NEDD8-002|ENSG00000129559.8|ENST00000396828.4|protein_coding	0.579152	5.0624e-06	0.000793919
chr3	58413408	58419543	PDHB|PDHB-003|ENSG00000168291.8|ENST00000479945.1|protein_coding	0.418662	0.000143046	0.0100387
chr10	120927222	120938345	PRDX3|PRDX3-001|ENSG00000165672.5|ENST00000298510.2|protein_coding	0.496827	7.92553e-07	0.000179129
chr1	40204560	40219388	PPIE|PPIE-004|ENSG00000084072.12|ENST00000495526.1|protein_coding	0.525996	0.000316663	0.0176901
chr15	25200135	25223729	SNURF|SNURF-201|ENSG00000273173.1|ENST00000338094.6|protein_coding	0.45761	0.000100948	0.00791465
chrY	21154353	21154595	CD24P4|CD24P4-001|ENSG00000185275.6|ENST00000382840.3|pseudogene	0.6185	0.000501132	0.0241097
chr16	29973998	29984339	TMEM219|TMEM219-001|ENSG00000149932.12|ENST00000566848.1|protein_coding	0.498802	0.000611622	0.0276471
chr8	146075604	146078419	COMMD5|COMMD5-004|ENSG00000170619.8|ENST00000305103.3|protein_coding	0.669596	0.000303421	0.0172714
chr12	56510565	56511429	RPL41|RPL41-005|ENSG00000229117.4|ENST00000552314.1|protein_coding	1.49256	3.8328e-28	7.36329e-25
chr7	99746980	99751826	LAMTOR4|LAMTOR4-009|ENSG00000188186.6|ENST00000473459.1|protein_coding	0.834354	4.14322e-07	0.000101075
chr18	10670238	11148587	PIEZO2|PIEZO2-007|ENSG00000154864.7|ENST00000302079.6|protein_coding	0.759719	0.000553026	0.025976
chr20	60962353	60963576	RPS21|RPS21-002|ENSG00000171858.13|ENST00000370562.1|protein_coding	0.667288	7.63458e-06	0.00107648
chr1	152004982	152020383	S100A11|S100A11-002|ENSG00000163191.5|ENST00000478109.1|protein_coding	0.609622	0.000616863	0.0278022
chr14	23299096	23304246	MRPL52|MRPL52-001|ENSG00000172590.14|ENST00000397496.3|protein_coding	0.648153	9.06578e-06	0.00124403
chr8	38854505	38962520	ADAM9|ADAM9-001|ENSG00000168615.7|ENST00000487273.2|protein_coding	0.449607	0.000178921	0.0117514
chr1	161192082	161193403	APOA2|APOA2-003|ENSG00000158874.7|ENST00000481413.1|protein_coding	0.864183	7.46761e-05	0.00627156
chr17	74620843	74639868	ST6GALNAC1|ST6GALNAC1-004|ENSG00000070526.10|ENST00000592042.1|protein_coding	0.743072	0.000703523	0.030597
chr14	21152818	21168710	RNASE4|RNASE4-201|ENSG00000258818.2|ENST00000304704.4|protein_coding	0.762964	2.90201e-05	0.00307593
chr6	33239865	33244282	RPS18|RPS18-006|ENSG00000231500.2|ENST00000474626.1|protein_coding	0.859522	8.08965e-10	4.78192e-07
chrX	119005450	119010625	NDUFA1|NDUFA1-001|ENSG00000125356.6|ENST00000371437.4|protein_coding	0.502326	0.000403226	0.0206573
chr4	48833082	48863265	OCIAD1|OCIAD1-001|ENSG00000109180.10|ENST00000264312.7|protein_coding	0.369664	0.000964366	0.0389012
chr11	116700631	116703788	APOC3|APOC3-003|ENSG00000110245.7|ENST00000375345.1|protein_coding	1.04639	5.84425e-09	2.24551e-06
chrX	103173479	103220554	TMSB15B|TMSB15B-001|ENSG00000158427.10|ENST00000419165.1|protein_coding	0.737368	3.77118e-05	0.0037393
chr17	7306302	7307358	TMEM256|TMEM256-002|ENSG00000205544.3|ENST00000576017.1|protein_coding	0.980809	4.28873e-09	1.83093e-06
chr19	45582520	45594782	GEMIN7|GEMIN7-001|ENSG00000142252.6|ENST00000270257.4|protein_coding	0.493664	0.00101767	0.0401039
chr16	67876213	67878097	THAP11|THAP11-001|ENSG00000168286.1|ENST00000303596.1|protein_coding	0.481355	0.00119464	0.0432803
chr12	7053186	7055165	C12orf57|C12orf57-001|ENSG00000111678.6|ENST00000229281.5|protein_coding	0.563766	0.00114335	0.043032
chr12	53433383	53440834	RP11-983P16.4|RP11-983P16.4-004|ENSG00000257337.2|ENST00000546566.1|antisense	0.625943	0.00137894	0.047272
chr19	14676890	14682874	NDUFB7|NDUFB7-002|ENSG00000099795.2|ENST00000593353.1|protein_coding	0.504866	0.000396724	0.0205988
chr5	172741716	172756506	STC2|STC2-001|ENSG00000113739.6|ENST00000265087.4|protein_coding	0.426628	0.00144143	0.0483696
chr6	35436185	35438562	RPL10A|RPL10A-005|ENSG00000198755.6|ENST00000467020.1|protein_coding	0.594601	0.000124837	0.0091211
chr2	24272601	24286551	FKBP1B|FKBP1B-003|ENSG00000119782.9|ENST00000438630.1|protein_coding	0.651819	0.000125685	0.0091211
chr4	666225	668127	ATP5I|ATP5I-001|ENSG00000169020.5|ENST00000304312.4|protein_coding	0.666123	1.09342e-05	0.0014356
chr15	67493371	67547074	AAGAB|AAGAB-001|ENSG00000103591.8|ENST00000261880.5|protein_coding	0.354935	0.00138104	0.047272
chr13	29233241	29253062	POMP|POMP-001|ENSG00000132963.7|ENST00000380842.4|protein_coding	0.409015	0.00119317	0.0432803
chr11	74862032	74917594	SLCO2B1|SLCO2B1-001|ENSG00000137491.10|ENST00000289575.5|protein_coding	0.785444	2.4553e-06	0.000433741
chr8	99053949	99057773	RPL30|RPL30-010|ENSG00000156482.6|ENST00000518850.1|protein_coding	0.473239	0.000366953	0.0193804
chr12	54058950	54070109	ATP5G2|ATP5G2-003|ENSG00000135390.13|ENST00000394349.3|protein_coding	0.811384	2.10613e-09	1.07897e-06
chr11	111957627	112064528	SDHD|SDHD-004|ENSG00000255292.2|ENST00000525987.1|protein_coding	0.986265	1.54094e-06	0.000303624
chr22	41972935	41985875	PMM1|PMM1-002|ENSG00000100417.7|ENST00000472620.1|protein_coding	0.561932	5.17619e-05	0.00470727
chr8	80830952	80942506	MRPS28|MRPS28-001|ENSG00000147586.5|ENST00000276585.4|protein_coding	0.556961	0.000100183	0.007896
chr17	8271956	8286505	RP11-849F2.7|RP11-849F2.7-001|ENSG00000263809.1|ENST00000582471.1|protein_coding	0.803392	1.2853e-06	0.00026547
chr1	154377669	154441926	IL6R|IL6R-001|ENSG00000160712.8|ENST00000368485.3|protein_coding	0.523143	0.00127574	0.0448668
chr11	65601450	65624367	SNX32|SNX32-008|ENSG00000172803.13|ENST00000530101.1|protein_coding	1.13666	4.53565e-09	1.88401e-06
chr1	93297582	93307481	RPL5|RPL5-001|ENSG00000122406.8|ENST00000370321.3|protein_coding	0.483789	0.000245579	0.0147434
chr14	104378639	104387838	C14orf2|C14orf2-005|ENSG00000156411.5|ENST00000414262.2|protein_coding	0.48514	0.000621456	0.0279274
chr15	25068794	25223729	SNRPN|SNRPN-003|ENSG00000128739.16|ENST00000400100.1|protein_coding	0.455357	0.00010145	0.00791465
chr6	52535907	52551386	TMEM14A|TMEM14A-001|ENSG00000096092.5|ENST00000211314.4|protein_coding	0.582704	0.000142289	0.0100314
chr7	140705854	140714479	MRPS33|MRPS33-002|ENSG00000090263.11|ENST00000393008.3|protein_coding	0.559595	0.000347662	0.0186713
chrX	118599997	118603058	SLC25A5-AS1|SLC25A5-AS1-003|ENSG00000224281.4|ENST00000395539.2|processed_transcript	0.795798	0.000123565	0.00908646
chr1	201103901	201123568	TMEM9|TMEM9-002|ENSG00000116857.12|ENST00000367330.1|protein_coding	0.454711	0.000299232	0.0170963
chr2	241826079	241835573	C2orf54|C2orf54-001|ENSG00000172478.13|ENST00000388934.4|protein_coding	0.597494	0.00031203	0.0175663
chr1	110210688	110217908	GSTM2|GSTM2-002|ENSG00000213366.8|ENST00000241337.4|protein_coding	0.738027	1.12038e-08	4.19978e-06
chr1	201979645	201986316	ELF3|ELF3-001|ENSG00000163435.11|ENST00000367284.5|protein_coding	0.467219	0.00114764	0.043032
chr15	77336359	77363570	TSPAN3|TSPAN3-001|ENSG00000140391.10|ENST00000267970.4|protein_coding	0.46345	2.78707e-07	7.51482e-05
chr15	66791658	66797184	RPL4|RPL4-005|ENSG00000174444.10|ENST00000567229.1|protein_coding	0.49847	0.000340062	0.0184623
chrX	129518319	129519511	GPR119|GPR119-001|ENSG00000147262.2|ENST00000276218.2|protein_coding	0.761025	0.000115974	0.00869468
chr19	5690207	5691887	RPL36|RPL36-003|ENSG00000130255.8|ENST00000347512.3|protein_coding	0.478105	0.000593524	0.0270679
chr22	37600278	37608362	SSTR3|SSTR3-001|ENSG00000183473.5|ENST00000328544.3|protein_coding	0.804372	8.52247e-05	0.00693025
chr2	27994584	28002608	MRPL33|MRPL33-001|ENSG00000243147.3|ENST00000296102.3|protein_coding	0.534506	7.42398e-05	0.00626918
chr14	24683161	24701542	NEDD8-MDP1|NEDD8-MDP1-002|ENSG00000255526.2|ENST00000605847.1|protein_coding	0.497808	0.00125498	0.0445446
chr22	39708889	39716394	RPL3|RPL3-002|ENSG00000100316.11|ENST00000465618.1|protein_coding	0.470376	0.000109234	0.00835236
chr11	64888106	64889589	FAU|FAU-002|ENSG00000149806.6|ENST00000531357.1|protein_coding	0.56674	6.36982e-05	0.00546915
chr12	120876001	120897809	AL021546.6|AL021546.6-001|ENSG00000111780.8|ENST00000551806.1|protein_coding	1.07197	1.60417e-11	1.5409e-08
chr15	44069298	44086793	SERF2|SERF2-001|ENSG00000140264.15|ENST00000381359.1|protein_coding	0.464786	0.000402047	0.0206573
chr1	948803	949920	ISG15|ISG15-001|ENSG00000187608.5|ENST00000379389.4|protein_coding	0.962628	1.15555e-05	0.00146773
chr9	34329504	34343709	NUDT2|NUDT2-001|ENSG00000164978.13|ENST00000379158.2|protein_coding	0.620169	0.000261602	0.0154044
chr4	89442136	89444964	PYURF|PYURF-001|ENSG00000145337.4|ENST00000273968.4|protein_coding	0.455852	0.000407543	0.0208091
chr14	39703120	39722859	MIA2|MIA2-001|ENSG00000150526.7|ENST00000280082.3|protein_coding	0.660494	0.000763336	0.0324081
chr7	140396510	140406446	NDUFB2|NDUFB2-002|ENSG00000090266.8|ENST00000476181.1|protein_coding	0.642298	1.58451e-06	0.000304403
chr19	35531410	35557475	HPN|HPN-002|ENSG00000105707.9|ENST00000262626.2|protein_coding	0.540399	0.000241223	0.0146536
chr17	1472561	1532130	SLC43A2|SLC43A2-001|ENSG00000167703.10|ENST00000301335.5|protein_coding	0.635858	0.00119475	0.0432803
chr5	85913721	85916779	COX7C|COX7C-001|ENSG00000127184.6|ENST00000247655.3|protein_coding	0.806772	2.37739e-08	8.11959e-06
chr5	147204131	147211349	SPINK1|SPINK1-001|ENSG00000164266.6|ENST00000296695.5|protein_coding	0.731735	8.19358e-08	2.51854e-05
chr3	50388276	50391483	CYB561D2|CYB561D2-002|ENSG00000114395.6|ENST00000424512.1|protein_coding	0.624619	0.00135726	0.0468758
chr1	153598808	153606816	RP1-178F15.5|RP1-178F15.5-002|ENSG00000271853.1|ENST00000497086.1|processed_transcript	0.637101	0.000807119	0.0337082
