# Supplementary material for: Pancreatic progenitor epigenome maps prioritize type 2 diabetes risk genes with roles in development
Source: eLife. 2021 Feb 5;10:e59067. doi: 10.7554/eLife.59067 (PMC7864636; doi:10.7554/eLife.59067)
Supplement: Figure 5—source data 1. [file elife-59067-fig5-data1.xlsx]

## Sheet: 1
Figure 5 – source data 1: Genes downregulated in ∆CRB2Enh PP2 stage cells compared to control cells (p adj. < .05).
chr	start	end	Gene ID	Log2-fold Change	p-value	adj. p-value
chr9	126131058	126142603	CRB2|CRB2-002|ENSG00000148204.7|ENST00000460253.1|protein_coding	-2.07062	1.03074e-06	0.00351327
chr16	28548606	28550495	NUPR1|NUPR1-001|ENSG00000176046.7|ENST00000324873.6|protein_coding	-1.07432	3.28066e-06	0.00623542
chr3	108262214	108262722	RP11-381E24.1|RP11-381E24.1-001|ENSG00000241634.1|ENST00000489433.1|pseudogene	-1.89304	1.26886e-05	0.0172997
chr11	66115421	66131231	RP11-867G23.8|RP11-867G23.8-001|ENSG00000255468.2|ENST00000531602.1|protein_coding	-1.98687	3.29287e-06	0.00623542
chr5	151040657	151066726	SPARC|SPARC-001|ENSG00000113140.6|ENST00000231061.4|protein_coding	-1.62702	1.73872e-07	0.00084663
chr14	21860309	21860412	SNORD9|SNORD9-201|ENSG00000199436.1|ENST00000362566.1|snoRNA	-1.08232	2.0912e-06	0.00509133
chr6	127439749	127518441	RSPO3|RSPO3-003|ENSG00000146374.9|ENST00000356698.4|protein_coding	-1.84644	1.98937e-05	0.025114
chr7	155592680	155604967	SHH|SHH-001|ENSG00000164690.3|ENST00000297261.2|protein_coding	-2.79642	5.23615e-11	5.94914e-07
chr11	66330934	66336067	CTSF|CTSF-001|ENSG00000174080.6|ENST00000310325.5|protein_coding	-1.34331	1.55972e-05	0.0204473
chr16	56659710	56661024	MT1E|MT1E-002|ENSG00000169715.10|ENST00000330439.6|protein_coding	-1.90271	1.13064e-05	0.0162997
